1

2           **Age-associated sleep-wake patterns are altered with Prdm13 signaling in the**  
3                           **dorsomedial hypothalamus and dietary restriction in mice**

4

5 Shogo Tsuji<sup>1,13</sup>, Cynthia S Brace<sup>2,13</sup>, Ruiqing Yao<sup>1</sup>, Yoshitaka Tanie<sup>1</sup>, Hirobumi Tada<sup>3,4,5</sup>,

6           Nicholas Rensing<sup>6</sup>, Seiya Mizuno<sup>7</sup>, Julio Almunia<sup>8</sup>, Yingyi Kong<sup>9</sup>, Kazuhiro

7           Nakamura<sup>10</sup>, Noboru Ogiso<sup>8</sup>, Shinya Toyokuni<sup>9</sup>, Satoru Takahashi<sup>7</sup>, Michael Wong<sup>6</sup>,

8                           Shin-ichiro Imai<sup>2,11</sup>, Akiko Satoh<sup>1,12\*</sup>

9

10           <sup>1</sup>Department of Integrative Physiology, <sup>4</sup>Department of Inflammation and  
11           Immunosenescence, Geroscience Research Center, <sup>8</sup>Laboratory of Experimental Animals,  
12           National Center for Geriatrics and Gerontology (NCGG), Obu, Japan.

13           <sup>2</sup>Department of Developmental Biology, <sup>6</sup>Department of Neurology, Washington  
14           University School of Medicine, St. Louis, MO, USA.

15           <sup>3</sup>Department of Nutrition, Faculty of Wellness, Shigakkan University, Obu, Japan.

16           <sup>5</sup>Department of Physiology, Yokohama City University Graduate School of Medicine,  
17           Yokohama, Japan.

18           <sup>7</sup>Laboratory Animal Resource Center, University of Tsukuba, Tsukuba, Ibaraki, Japan.

19           <sup>9</sup>Department of Pathology and Biological Responses, <sup>10</sup>Department of Integrative  
20           Physiology, Nagoya University Graduate School of Medicine, Nagoya, Japan.

21           <sup>11</sup>Department of Gerontology, Laboratory of Molecular Life Science, Institute of  
22           Biomedical Research and Innovation (IBRI), Kobe, Japan.

23           <sup>12</sup>Department of Integrative Physiology, Institute of Development, Aging, and Cancer,  
24           Tohoku University, Sendai, Japan.

25           <sup>13</sup>equally contributing authors

26

27

28           \*Corresponding author:

29           Akiko Satoh, Ph.D.

30           Associate Professor

31           Department of Integrative Physiology

32           Geroscience Research Center,

33           National Center for Geriatrics and Gerontology

34           7-430 Morioka-cho, Obu, Aichi, 474-8511, Japan

35           Tel: +81-562-44-5651 ext. 7855

36           E-mail: [asatoh@ncgg.go.jp](mailto:asatoh@ncgg.go.jp)

37 **Abstract**

38 Old animals display significant alterations in sleep-wake patterns such as increases in sleep  
39 fragmentation and sleep propensity. Here we demonstrated that dorsomedial  
40 hypothalamus-specific *PR-domain containing protein 13*-knockout (DMH-*Prdm13*-KO)  
41 mice recapitulated age-associated sleep alterations such as sleep fragmentation and  
42 increased sleep attempts during sleep deprivation (SD). These phenotypes were further  
43 exacerbated during aging, with increased adiposity and decreased physical activity,  
44 resulting in shortened lifespan. Dietary restriction (DR), a well-known anti-aging  
45 intervention in diverse organisms, ameliorated age-associated sleep alterations, whereas  
46 these effects of DR were abrogated in DMH-*Prdm13*-KO mice. Moreover, overexpression  
47 of *Prdm13* in the DMH ameliorated sleep fragmentation and excessive sleepiness during  
48 SD in old mice. Therefore, maintaining *Prdm13* signaling in the DMH might play an  
49 important role to control sleep-wake patterns during aging.

50 The elderly commonly experiences changes in their sleep habits and sleep disruptions that  
51 causes problems, including waking often during the night, needing daytime naps, and  
52 having trouble falling asleep. The National Institute on Aging conducted a multicentered  
53 study called “Established Populations for Epidemiologic Studies of the Elderly (EPESE)”  
54 with more than 9,000 participants aged 65 years and older<sup>1</sup>. Interestingly, people who  
55 reported excessive sleepiness during the afternoon or evening had a slight, but statistically  
56 significant increase in the odds for 3-year mortality. Even in mice, recent studies have  
57 demonstrated that old C57BL/6J mice exhibit reduced amount of wakefulness and  
58 increased amount of non-rapid eye movement (NREM) sleep<sup>2-4</sup>. In both humans and mice,  
59 old individuals display sleep fragmentation, characterized by shorter episode durations of  
60 wakefulness, NREM and REM sleep, compared with young individuals<sup>2,3,5-8</sup>. Indeed,  
61 chronic sleep fragmentation is known to be associated with derailments in physiological  
62 functions, including low physical activity, increased adiposity and metabolic  
63 dysfunction<sup>9,10</sup>. Thus, it is conceivable that the dysregulation of sleep-wake patterns has a  
64 mechanistic connection to age-associated physiological decline. However, such a  
65 mechanistic connection has remained elusive, and it is unclear whether any effective  
66 intervention could improve age-associated sleep dysfunction.

67

68 The hypothalamus plays a critical role in the regulation of sleep-wake patterns<sup>11</sup> and aging  
69 and longevity in mammals<sup>12-14</sup>. In our previous study, we have demonstrated that the  
70 mammalian NAD<sup>+</sup>-dependent protein deacetylase Sirt1 in the dorsomedial and lateral  
71 hypothalami (DMH and LH, respectively) delays aging, with significant enhancement of  
72 physical activity, oxygen consumption, body temperature and delta power, which is an

73 indicator for depth of sleep, and extends lifespan in mice<sup>12-14</sup>. Furthermore, knockdown of  
74 *Sirt1* in the DMH and LH causes low delta power, and another mouse model with high  
75 hypothalamic Sirt1 activity displays reduced sleep fragmentation with advanced age and  
76 lifespan extension<sup>15</sup>. These findings suggested a possibility that a specific subpopulation  
77 of Sirt1-expressing neurons in the DMH and/or LH controls sleep-wake patterns during the  
78 process of aging. We previously conducted a comprehensive transcriptome analysis to  
79 identify DMH-enriched genes and identified *PR-domain containing factor 13 (Prdm13)*.  
80 Importantly, *Prdm13* is regulated by Sirt1 signaling, and DMH-specific *Prdm13*  
81 knockdown mice show low delta power<sup>16</sup>. Therefore, we hypothesized that Prdm13  
82 signaling in the DMH, where Sirt1 signaling is involved in aging and longevity control, is  
83 causally involved in age-associated sleep alterations.

84

85 In the present study, to address this hypothesis, we generated DMH-specific *Prdm13*-  
86 knockout (DMH-*Prdm13*-KO) mice and found that DMH-*Prdm13*-KO mice display sleep  
87 fragmentation and excessive sleepiness during sleep deprivation (SD), which are common  
88 phenomena in aged C57BL/6J mice. Aging DMH-*Prdm13*-KO mice displayed further  
89 exaggerated sleep alterations, increased adiposity, decreased physical activity and  
90 shortened lifespan. We also found that dietary restriction (DR), a well-known anti-aging  
91 intervention in diverse organisms<sup>17</sup>, ameliorates age-associated derailment of sleep-wake  
92 patterns. These effects of DR were abrogated in DMH-*Prdm13*-KO mice. Moreover,  
93 overexpression of *Prdm13* in the DMH ameliorated sleep fragmentation and excessive  
94 sleepiness during SD in old mice. Thus, our results suggest that Prdm13 is involved in the

95 regulation of sleep-wake patterns by DR, and that maintaining the function of Prdm13  
96 signaling promotes youthful sleep-wake patterns during the process of aging.

97

## 98 **Results**

### 99 **Old mice showed increases in sleep fragmentation and sleep propensity compared to** 100 **young mice**

101 Sleep fragmentation is one of the most common clinical characteristics in old individuals  
102 in both humans and mice<sup>2,3,5-8</sup>. To confirm age-associated sleep fragmentation, we  
103 conducted electroencephalogram (EEG) and electromyogram (EMG) recordings in young  
104 and old mice at 4 and 20 months of age, respectively. Old mice displayed greater sleep  
105 fragmentation compared to young mice during the light period (rest period), and  
106 predominantly during the dark period (active period) (**Fig. 1a,b**). During the dark period,  
107 the number of wakefulness, NREM and REM sleep episodes in old mice were significantly  
108 higher than young mice (**Fig. 1a**), whereas the duration of wakefulness and REM sleep  
109 episodes in old mice were shorter than young mice (**Fig. 1b**). The duration of REM sleep  
110 episodes in old mice was also shorter during the light period (**Fig. 1b**). The number of  
111 wakefulness episodes in old mice was significantly higher than young mice during the light  
112 period at ZT6-8, whereas the number of NREM sleep episodes in old mice was tended to  
113 be higher (**Fig. 1a**). In addition, in a 24-hour period, old mice spent less time awake and  
114 more time in NREM sleep (**Fig.1c, Supplementary Fig. 1a**). As most mouse studies  
115 reported<sup>2-4,7</sup>, the total amount of wakefulness in old mice was significantly lower than  
116 young controls during the dark period, whereas the total amount of NREM sleep was higher  
117 (**Fig. 1c**). Similar differences were also observed during the light period (**Fig.1c**). Together,

118 our data confirm that old mice display greater sleep fragmentation and spend more time  
119 asleep compared to young mice.

120

121 To examine the profile of EEG spectra during each state in young and old mice, we used  
122 fast Fourier transform (FFT) of EEG recordings. During wakefulness, the power of EEG  
123 in the frequency range between 4.3 to 12 Hz in old mice was significantly lower than young  
124 mice (repeated measures AVOVA: factor Age  $F_{(1,13)}=4.920$ ,  $p=0.0450$ ) (**Fig. 1d**). Since the  
125 activity of the theta frequency range during wakefulness is correlated with arousal<sup>3,7</sup>, old  
126 mice might have reduced arousal and less exploratory behavior compared to young mice.  
127 This result is consistent with the finding that old mice display an increased sleep propensity  
128 (**Fig. 1c**). The spectral power of the delta frequency range during NREM sleep is known  
129 as slow wave activity (SWA) and a good indicator of sleep intensity<sup>7</sup>. It has been reported  
130 that the absolute value of EEG SWA is significantly increased<sup>3,4</sup> or tended to be increased<sup>7</sup>  
131 in old mice. In our study, the power of the NREM EEG in the frequency range between  
132 2.3-6.3 Hz in old mice was higher than young mice, but this trend did not reach statistical  
133 significance (repeated measures AVOVA: factor Age  $F_{(1,13)}=2.029$ ,  $p=0.1778$ ) (**Fig. 1d**).  
134 The absolute value of SWA in old mice during a 24-hour period also tended to be increased  
135 compared to young mice (**Fig. 1e**). It has been suggested that absolute levels of SWA  
136 correlate with sleep pressure<sup>3</sup>, thus old mice might be exposed daily to a high sleep pressure  
137 compared with young mice. Although some studies showed significantly lower theta peak  
138 of REM EEG spectra in old mice, no notable differences were found in the REM EEG  
139 spectra in the frequency range between 4-9 Hz in our study (**Fig. 1d**).

140

141 **Old mice display increased sleep attempts during SD and homeostatic sleep response**  
142 **to SD**

143 We next evaluated whether aging affects homeostatic sleep response by examining  
144 responses to SD in young and old mice. Sleep was disrupted by gentle handling for six  
145 hours, and then the mice were allowed to recover sleep loss (**Fig. 1f**). The number of sleep  
146 attempts gradually increased during SD in both young and old mice, and we noticed that  
147 old mice showed excessive sleepiness as their sleep attempts during SD were much greater  
148 than young mice (repeated measures ANOVA: factor Age  $F_{(1,14)}=13.03$ ,  $p=0.0028$ ) (**Fig.**  
149 **1g**). Thus, these results suggest that old mice might be more susceptible to accumulate  
150 sleep pressure from sleep loss than young mice. On the other hand, both young and old  
151 mice displayed a significant increase in SWA after SD (**Fig. 1h, Supplementary Fig. 1b**),  
152 indicating that the homeostatic response to SD is intact in old mice, which is consistent  
153 with other recent literature<sup>3,4,7</sup>. Surprisingly, the level of initial increase of SWA after SD  
154 in old mice was significantly higher than young mice (repeated measures ANOVA: factor  
155 Age x Time  $F_{(5,70)}=3.583$ ,  $p=0.0061$ ), further supporting the notion that old mice might  
156 accumulate more sleep pressure during SD.

157

158 **The number of cFos+ cells in brain regions involved in the regulation of arousal and**  
159 **sleepiness increases significantly during SD**

160 We examined which brain regions mainly responded to SD by staining the cFos protein,  
161 an immediate early gene product and a marker of neuronal activation<sup>18</sup>, in brain sections  
162 collected during SD, recovery sleep (RS), and control-sleep (SD-Cont and RS-Cont) (**Fig.**  
163 **1f**). During SD, we found that the number of cFos+ cells was elevated in the brain regions

164 known to regulate arousal and sleepiness, including the hypothalamus and brainstem. In  
165 the hypothalamus, the DMH, particularly at bregma -1.67 and -1.91mm, showed a greater  
166 number of cFos+ cells during SD compared to SD-Cont (**Fig. 2a-c, Supplementary Fig.**  
167 **2a**). The median preoptic nucleus (MnPO) also showed increases in cFos+ cells during SD  
168 (**Supplementary Fig. 2b**), but not statistically significant. The number of cFos+ cells were  
169 significantly suppressed during RS in the DMH and MnPO compared with SD (**Fig. 2a,**  
170 **Supplementary Fig. 2b**). The LH, ventrolateral preoptic nucleus (VLPO) and  
171 tuberomammillary nucleus (TMN) exhibited no differences between SD-Cont and SD,  
172 although the number of cFos+ cells were significantly suppressed during RS in the LH and  
173 TMN compared with SD (**Supplementary Fig. 2b**). Therefore, neurons in the DMH and  
174 MnPO are activated specifically in response to sleep loss during SD. Whereas cFos+ cells  
175 in response to SD have been reported in the MnPO<sup>19,20</sup>, those in the DMH have been poorly  
176 characterized. Although DMH neurons are linked to aging and longevity control<sup>12-14</sup> and  
177 also activated by psychological stress<sup>21</sup>, the involvement of DMH neurons in sleep control  
178 has not been fully elucidated. Thus, we decided to focus on these cFos+ cells in the DMH  
179 in response to SD.

180

### 181 **Prdm13+ neurons in the DMH are activated in response to SD**

182 Given that *Prdm13* is one of the DMH-enriched genes and involved in sleep regulation<sup>16</sup>,  
183 we suspected that the cFos+ DMH cells responding to SD would include Prdm13+ neurons.  
184 To visualize Prdm13+ cells, *Prdm13*-CreERT2 mice were produced by targeted insertion  
185 of the coding sequence of tamoxifen-inducible Cre recombinase and 2A peptide into the  
186 native 3' end of the *Prdm13* gene, generating the Prdm13-2A-CreERT2 protein. By



187 crossing *Prdm13*-CreERT2 mice to Cre-dependent ZsGreen reporter mice, *Prdm13*<sup>+</sup> cells  
188 were visualized in the DMH and other brain regions such as the tuberal nucleus (TN) and  
189 amygdala (Amg) (**Fig. 2d**). No ZsGreen expression was observed without tamoxifen (data  
190 not shown). *In situ* hybridization confirmed ZsGreen<sup>+</sup> cells were co-localized with  
191 endogenous *Prdm13* mRNA (**Supplementary Fig. 2c**). We also investigated  
192 electrophysiological characteristics of *Prdm13*<sup>+</sup> DMH cells by whole cell patch-clamp  
193 technique. Using *Prdm13*-CreERT2-ZsGreen mice at 5-6 months of age, ZsGreen<sup>+</sup>  
194 (*Prdm13*<sup>+</sup>) cells in the compact area of the DMH were selected (**Supplementary Fig. 2d**).  
195 We recorded synaptic activity (**Supplementary Fig. 2e**) and membrane capacitance (C<sub>m</sub>),  
196 which is correlated with the morphology of neurons<sup>22</sup> (**Supplementary Fig. 2f**), and  
197 confirmed that *Prdm13*<sup>+</sup> DMH cells are electrically active cells, such as a neuron.  
198 Importantly, RNAscope analysis, a highly sensitive *in situ* hybridization method, revealed  
199 that the percentage of *cFos*<sup>+</sup> cells among *Prdm13*<sup>+</sup> DMH neurons was significantly higher  
200 during SD than SD-Cont (**Fig. 2e-g**). Thus, *Prdm13*<sup>+</sup> neuronal population in the DMH  
201 responds to sleep loss during SD.

202

### 203 **Mice with deficiency of *Prdm13* in the DMH display sleep fragmentation and excessive** 204 **sleepiness during SD**

205 To elucidate the role of *Prdm13* signaling in age-associated sleep alterations, we generated  
206 DMH-*Prdm13*-KO mice. Our previous study demonstrated that *Prdm13* expression is  
207 partially regulated by *Nkx2-1*, which is highly expressed in the DMH<sup>16</sup>. We confirmed that  
208 most of *Prdm13* is co-expressed with *Nkx2-1* in the DMH, but not in the TN and Amg  
209 (**Supplementary Fig. 3a**). The percentage of *Prdm13*<sup>+</sup>*Nkx2-1*<sup>+</sup> cells within *Prdm13*<sup>+</sup>

210 cells was  $60 \pm 7.6\%$ ,  $71 \pm 6.1\%$  and  $81 \pm 3.9\%$  at bregma -1.43mm to -1.67mm, -1.79mm and  
211 -1.91mm, respectively (**Supplementary Fig. 3b**). Thus, we crossed *Prdm13*-floxed mice  
212 with *Nkx2-1*-CreERT2 mice to generate DMH-*Prdm13*-KO mice (**Fig. 3a**). The knockout  
213 efficiency of *Prdm13* in the DMH was about 70% after tamoxifen induction (**Fig. 3b**).  
214 Significant reduction of *Prdm13* expression was not observed in the TN and Amg of DMH-  
215 *Prdm13*-KO mice (**Fig. 3b**), and this event was specific to the hypothalamus since the  
216 expression of *Prdm13* remained intact in the retina where *Prdm13* is highly expressed  
217 (**Supplementary Fig. 3c**).

218

219 We then analyzed sleep-wake patterns in DMH-*Prdm13*-KO and control mice at 4-6  
220 months of age. During the light period between ZT0 to ZT5, DMH-*Prdm13*-KO mice  
221 showed a tendency of increase in the numbers of wakefulness and NREM sleep episodes  
222 compared with control mice (wakefulness; repeated measure ANOVA: factor Genotype  
223  $F_{(1,10)}=4.796$ ,  $p=0.053$ , NREM sleep; repeated measure ANOVA: factor Genotype  
224  $F_{(1,10)}=3.539$ ,  $p=0.089$ ) (**Fig. 3c**). The duration of wakefulness episodes in DMH-*Prdm13*-  
225 KO mice was significantly shorter than control mice during the light period, and the  
226 duration of NREM sleep episodes in DMH-*Prdm13*-KO mice was significantly longer than  
227 control mice during the dark period (**Fig. 3d**). These results indicate that DMH-*Prdm13*-  
228 KO mice showed mild sleep fragmentation compared with control mice. We also assessed  
229 their responses to SD. The number of sleep attempts during SD in DMH-*Prdm13*-KO mice  
230 was significantly higher than those in control mice (repeated measure ANOVA: factor  
231 Genotype  $F_{(1,25)}=9.131$ ,  $p=0.0057$ ) (**Fig. 3e**), recapitulating the phenotype of old wild-type  
232 mice (**Fig. 1g**). The level of initial increase of SWA after SD in DMH-*Prdm13*-KO mice

233 was similar to control mice (**Fig. 3f, Supplementary Fig. 3d**), suggesting that the level of  
234 sleep pressure is comparable to each other. During wakefulness, the power of the EEG  
235 spectra at the frequency range between 4-12 Hz, in particular 4-9 Hz, in DMH-*Prdm13*-  
236 KO mice tended to be lower than control mice (repeated measures AVOVA: factor  
237 Genotype  $F_{(1,9)}=0.7446$ ,  $p=0.4106$ ) (**Fig. 3g**), but there was no statistical significance. This  
238 trend was observed in old wild-type mice (**Fig. 1d**). The absolute value of SWA in DMH-  
239 *Prdm13*-KO mice during a 24-hour period tended to be higher compared to young mice  
240 (**Supplementary Fig. 3e**), but was not statistically significant. There were no abnormalities  
241 in the amounts of sleep and wakefulness, circadian period length and wheel-running  
242 activity in DMH-*Prdm13*-KO mice (**Fig. 3h, Supplementary Fig. 3f-h**). Together, DMH-  
243 *Prdm13*-KO mice develop a moderate degree of sleep fragmentation, while the levels of  
244 sleep pressure and sleep propensity are still comparable with control mice at young age.

245

246 **Old DMH-*Prdm13*-KO mice display increased sleep fragmentation, adiposity, low**  
247 **physical activity and short lifespan compared to old control mice**

248 To address the possibility that DMH-*Prdm13*-KO mice might accelerate physiological  
249 changes with advanced age, we conducted additional assessments using DMH-*Prdm13*-  
250 KO and control mice at 20 months of age. The level of sleep fragmentation in old DMH-  
251 *Prdm13*-KO mice was significantly higher than old control mice (**Fig. 4a,b**). In old DMH-  
252 *Prdm13*-KO mice, the number of wakefulness and NREM sleep episodes were  
253 significantly higher during the light period (**Fig. 4a**), and episode duration of wakefulness  
254 was significantly shorter (**Fig. 4b**) compared with old control mice. The duration of NREM  
255 sleep episodes in old DMH-*Prdm13*-KO mice was significantly shorter during the dark

256 phase compared with old control mice (**Fig. 4b**). Therefore, long-term deficiency of  
257 *Prdm13* signaling in the DMH worsens sleep fragmentation, particularly during the light  
258 period. The power of the EEG spectra at the frequency between 4-12 Hz, in particular 6.6  
259 to 12 Hz, during wakefulness in old DMH-*Prdm13*-KO mice was significantly lower than  
260 old control mice (repeated measures AVOVA: factor Genotype  $F_{(1,8)}=5.337$ ,  $p=0.0497$ )  
261 (**Fig. 4c**), suggesting that old DMH-*Prdm13*-KO mice display increased sleep propensity  
262 compared with old control mice. No differences were found in the NREM and REM EEG  
263 spectra (**Fig. 4c**). The absolute value of SWA in old DMH-*Prdm13*-KO mice during a 24-  
264 hour period was tended to be higher compared to young mice (**Supplementary Fig. 4a**),  
265 but there was no statistical significance. Old DMH-*Prdm13*-KO mice displayed excessive  
266 sleepiness during SD compared with old controls (repeated measures ANOVA: factor  
267 Genotype  $F_{(1,9)}=5.341$ ,  $p=0.0462$ )(**Fig. 4d**). The level of initial increase of SWA after SD  
268 in old DMH-*Prdm13*-KO mice was significantly higher than old control mice (repeated  
269 measures ANOVA: factor Time x Genotype  $F_{(5,45)}=5.024$ ,  $p=0.0010$ ) (**Fig. 4e**,  
270 **Supplementary Fig. 4b**). Therefore, old DMH-*Prdm13*-KO mice presumably  
271 accumulated more sleep pressure during SD compared to old control mice. The circadian  
272 period length and the amount of sleep and wakefulness were indistinguishable between old  
273 DMH-*Prdm13*-KO and control mice (**Supplementary Fig. 4c-e**), suggesting that circadian  
274 function, one of the major factors governing sleep-wake patterns<sup>11</sup>, was still intact in old  
275 DMH-*Prdm13*-KO mice. Although there was no change in body weight between DMH-  
276 *Prdm13*-KO and control mice at young age, DMH-*Prdm13*-KO mice gained more body  
277 weight than control mice at 18-20 months of age (**Fig. 4f**). The weight of perigonadal white  
278 adipose tissue in old DMH-*Prdm13*-KO mice tended to be higher than control mice

279 (p=0.079 by unpaired t-test) (**Supplementary Fig. 4f**), and the size of adipocyte was  
280 significantly larger than control mice (**Supplementary Fig. 4g,h**). Moreover, the level of  
281 physical activity in old DMH-*Prdm13*-KO mice was significantly lower than old control  
282 mice (repeated measures ANOVA: factor Genotype  $F_{(1,10)}=8.842$ , p=0.014) (**Fig. 4g**),  
283 while there was no change in food intake (**Supplementary Fig. 4i**). Taken together, DMH-  
284 *Prdm13*-KO mice exhibited the exacerbation of physiological decline with advanced age.  
285 Consistent with these observations, DMH-*Prdm13*-KO mice shortened their lifespan  
286 (p=0.0178 by log-rank test) (**Fig. 4h**). Since malignant neoplasm is the main cause of death  
287 in C57BL/6J mice<sup>23</sup>, we next tested whether *Prdm13* deficiency in the DMH affects the  
288 incidence of malignant neoplasm. Most of the DMH-*Prdm13*-KO and control mice died  
289 by malignant neoplasm (83% and 86%, respectively), revealing that deletion of *Prdm13* in  
290 the DMH does not directly affect age-associated malignancy. Sleep alterations cause age-  
291 associated physiological dysfunctions<sup>9,10,24</sup>. Thus, alterations of sleep-wake patterns due to  
292 the deficiency of *Prdm13* may accelerate the decline in certain physiological function and  
293 reduce life expectancy without affecting age-associated malignancy.

294

### 295 **Short-term DR ameliorates age-associated sleep alterations in the presence of *Prdm13***

#### 296 **signaling**

297 DR has been well known to ameliorate a wide variety of age-associated pathophysiological  
298 dysfunctions, delaying aging and extending lifespan. Thus, we speculated that DR could  
299 also ameliorate age-associated sleep alterations observed in old mice. After gradually  
300 decreasing the amount of food to 60% of daily food intake, mice at 20 months of age were  
301 kept under DR for 14 to 28 days (**Fig. 5a**). Control mice were fed *ad libitum* (AL). To

302 minimize the disruption of their daily activity pattern, we fed mice at 5-6pm right before  
303 the dark period for both DR and AL mice. Every-day feeding did not cause disruption of  
304 the daily activity rhythm in AL and DR mice, except for some food-anticipatory  
305 activity<sup>25,26</sup> observed right before lights-off in DR mice (**Supplementary Fig. 5a**),  
306 resulting in increased total amount of wakefulness in DR mice during the light period  
307 (**Supplementary Fig. 5c**). Body weights in old DR mice were significantly lower than old  
308 AL mice at 14, 21 and 28 days after dietary intervention (**Supplementary Fig. 5b**).  
309 Remarkably, the number of wakefulness and NREM sleep episodes in old DR mice were  
310 significantly lower than old AL mice during the light and dark periods, and the number of  
311 REM sleep episodes in old DR mice were significantly lower (**Fig. 5b**), whereas the  
312 durations of wakefulness, NREM and REM sleep episodes were longer than old-AL mice  
313 (**Fig. 5c**). Intriguingly, the power of EEG spectra across the overall frequency range during  
314 NREM and REM sleep in DR mice were significantly lower than AL mice (NREM sleep:  
315 repeated measures ANOVA: factor Diet  $F_{(1,8)}=10.25$ ,  $p=0.0126$ , REM: repeated measures  
316 ANOVA: factor Diet  $F_{(1,8)}=5.405$ ,  $p=0.0486$ ) (**Fig. 5d**). It has been reported that starvation  
317 promotes significant reduction of EEG spectra due to hypothermia<sup>27</sup>. In fact, DR mice  
318 displayed significantly lower body temperature than AL mice over the course of  
319 experimental period (data not shown). Thus, decreases in EEG spectra in DR mice during  
320 NREM and REM sleep might be due to a low body temperature, not necessarily reflecting  
321 sleep pressure. The level of absolute SWA was significantly lower for a 24-hour period in  
322 DR mice but increased during a mealtime around ZT12 (**Supplementary Fig. 5d**), when  
323 body temperature is elevated, further supporting the idea that body temperature is  
324 associated with the regulation of EEG spectral power. In addition, DR significantly

325 suppressed the number of sleep attempts during SD (repeated measures ANOVA: factor  
326 Diet  $F_{(1,9)}=5.131$ ,  $p=0.0498$ ) (**Fig. 5e**). The level of SWA seen immediately after SD in DR  
327 mice was significantly lower than AL mice (repeated measures ANOVA: factor Time x  
328 Age  $F_{(5,39)}=11.70$ ,  $p<0.0001$ ) (**Fig. 5f, Supplementary Fig. 5e**), suggesting that DR mice  
329 have less sleep pressure after SD compared with AL mice. Notably, SWA was increased  
330 in DR mice compared with AL mice at 6 hours after SD (ZT11) when SWA increased in  
331 the basal condition (**Supplementary Fig. 5d**), suggesting that daily rhythm of SWA is  
332 strongly persistent after DR. Taken together, DR effectively ameliorated age-associated  
333 sleep fragmentation and excessive sleepiness during SD.

334

335 Importantly, in DMH-*Prdm13*-KO mice that recapitulate the phenotypes of old wild-type  
336 mice, the effects of DR on sleep fragmentation and sleep attempts during SD were  
337 abrogated (**Fig. 5g, Supplementary Fig. 5f,g**). As expected, body weight was significantly  
338 lower in DMH-*Prdm13*-KO mice under DR compared with the same KO mice under AL-  
339 feeding, confirming that DR is properly conducted (**Supplementary Fig. 5h**). The number  
340 and durations of wakefulness and NREM sleep episodes in DMH-*Prdm13*-KO mice were  
341 indistinguishable between AL and DR (**Supplementary Fig. 5f,g**). On the other hand, the  
342 number of REM sleep episodes in DMH-*Prdm13*-KO under DR was significantly lower  
343 during the light period, but higher during the dark period than DMH-*Prdm13*-KO under  
344 AL (**Supplementary Fig. 5f**). In addition, the number of sleep attempts during SD was  
345 also indistinguishable between DR and AL in DMH-*Prdm13*-KO mice (repeated measures  
346 ANOVA: factor Diet  $F_{(1,14)}=2.918$ ,  $p=0.1097$ ) (**Fig. 5g**). Except for food-anticipatory  
347 activity observed right before lights-off in DMH-*Prdm13*-KO-DR mice, the amount of

348 sleep and wakefulness were indistinguishable between DMH-*Prdm13*-KO mice under DR  
349 and DMH-*Prdm13*-KO mice under AL (**Supplementary Fig. 5i**). Together, these results  
350 strongly suggest that *Prdm13* is necessary to promote DR effects on sleep.

351

### 352 **Overexpression of *Prdm13* in the DMH ameliorates age-associated sleep alterations**

353 Given that the level of hypothalamic *Prdm13*<sup>16</sup> and its function decline with age, we next  
354 questioned whether overexpression of *Prdm13* in the DMH affects age-associated sleep  
355 alterations. We bilaterally injected lentivirus carrying a full-length *Prdm13* cDNA into the  
356 DMH of mice at 22 months of age. The level of *Prdm13* mRNA in DMH-specific *Prdm13*-  
357 overexpressing (*Prdm13*-OE) mice was 5 to 17-fold higher compared with control mice  
358 (**Fig. 5h**). Remarkably, the number of wakefulness and NREM sleep episodes in old  
359 *Prdm13*-OE mice were significantly lower, whereas duration of wakefulness in old  
360 *Prdm13*-OE mice was longer than old control mice, particularly during the dark period  
361 (**Fig. 5i,j**). Moreover, the number of sleep attempts during SD in old *Prdm13*-OE mice was  
362 significantly lower than control mice (**Fig. 5k**). The level of SWA after SD in *Prdm13*-OE  
363 mice did not differ from old control mice (**Fig. 5l, Supplementary Fig. 5j**). Thus, the  
364 restoration of *Prdm13* signaling in the DMH partially rescues age-associated sleep  
365 alterations.

366

### 367 ***Prdm13* functions as a transcription factor in the DMH**

368 What is the molecular function of *Prdm13* in the DMH? We found that the DMH expresses  
369 previously uncharacterized alternative splicing variants of *Prdm13* by 5'- rapid  
370 amplification of cDNA-ends (RACE)-PCR analysis (**Supplementary Fig. 6a,b**). To



371 further characterize the function of hypothalamic Prdm13 (htPrdm13), we developed an  
372 antibody against this variant. This antibody specifically detected the recombinant and  
373 overexpressed htPrdm13 proteins (data not shown) and also the deletion of Prdm13 in the  
374 DMH-*Prdm13*-KO mice (**Fig. 6a**), confirming its specificity. Using this antibody, we  
375 examined the subcellular localization of the Prdm13 protein by biochemical fractionation  
376 (**Fig. 6b left**). The Prdm13 protein was found exclusively in the RNase- and DNase-  
377 resistant nuclear scaffold fraction from wild-type hypothalami (**Fig. 6b right**). Nuclear  
378 localization of Prdm13 in the hypothalamus was also confirmed by using hypothalami from  
379 a newly developed mouse model expressing podoplanin (PA)-tagged Prdm13 (**Fig. 6c**).  
380 These results indicate that Prdm13 likely functions as a transcription factor in the DMH.  
381 This is consistent with a previous report showing that Prdm13, reported as Prdm13-202,  
382 acts as a transcription factor in the dorsal neural tube<sup>28</sup>. Intriguingly, among DMH-enriched  
383 genes that were previously reported<sup>16</sup>, the levels of *cholecystokinin (Cck)*, *gastrin releasing*  
384 *peptide (Grp)*, and *pro-melanin-concentrating hormone (Pmch)* mRNA were significantly  
385 reduced in the compact region of the DMH (Bregma -1.79 and -1.91) of DMH-*Prdm13*-  
386 KO mice (**Fig. 6d**). Transcriptional activities of *Cck* (one-way ANOVA,  $F_{(1.016, 3.047)}=10.89$ ,  
387  $p=0.0446$ ), *Grp* (one-way ANOVA,  $F_{(2.158, 6.474)}=11.63$ ,  $p=0.0068$ ), and *Pmch* (one-way  
388 ANOVA,  $F_{(1.547, 4.641)}=54.50$ ,  $p=0.0007$ ) promoters were upregulated by Prdm13-202 in a  
389 dose-dependent manner (**Fig. 6e**). As well as Prdm13-202, htPrdm13 also upregulated *Cck*  
390 transcription (one-way ANOVA,  $F_{(1.010, 2.020)}=49.88$ ,  $p=0.0189$ ) (**Fig. 6f**). Moreover, a  
391 Prdm13-zinc-finger (Zif) mutant with amino acid mutations (C187A, H207A, C622A,  
392 H638A, C650A, H666A, C679A, H695A), leading to inactivation of four Zif domains,  
393 showed significantly decreased transcriptional activity, whereas a Prdm13-PR/SET

394 deletion mutant still activated these promoters to levels similar to Prdm13-202 (**Fig. 6e**).  
395 These results reveal that the Zif domain, but not the PR/SET domain, is necessary for  
396 Prdm13 to upregulate the activity of *Cck*, *Grp* and *Pmch* promoters.

397

### 398 **DMH Prdm13+Cck+ neurons were activated during SD**

399 Notably, at bregma -1.67 mm in the DMH, *Prdm13* was co-localized with *Cck* or *Grp*  
400 within the *Prdm13*+ neuronal population about 26% and 14%, respectively, (**Fig. 7a,b**),  
401 but showed almost no co-localization with *Pmch* (**Supplementary Fig. 7a**). The  
402 percentage of *Prdm13*+*Cck*+ in *Prdm13*+ DMH neurons was significantly higher than the  
403 percentage of *Prdm13*+*Grp*+ neurons (**Fig. 7b**). Therefore, *Prdm13* might functionally or  
404 mechanistically connect with *Cck* and/or *Grp* in the DMH. *Cck*+ cells among *Prdm13*+  
405 DMH neurons, particularly at bregma -1.67 mm, were widely distributed, but significantly  
406 more predominant in the medial part than the lateral part ( $16.1\pm 1.3\%$  and  $9.8\pm 1.3\%$  in the  
407 medial and lateral parts, respectively, unpaired t-test:  $p<0.001$ ), while *Grp*+ cells among  
408 *Prdm13*+ DMH neurons were distributed mainly in the lateral part ( $2.9\pm 1.1\%$  and  
409  $10.9\pm 1.3\%$  in the medial and lateral parts, respectively, unpaired t-test:  $p<0.001$ ) (**Fig.**  
410 **7a,b**). During SD, 58% of *Prdm13*+*cFos*+ neurons in the DMH were localized in the  
411 medial part (**Fig. 7c,d**), where *Prdm13*+*Cck*+ neurons were their majority, whereas only a  
412 few *Prdm13*+*Grp*+ neurons were observed (**Supplementary Fig. 7b**). Thus, we  
413 questioned whether *Cck* is involved in the response to SD in this particular area. The  
414 percentage of *cFos*+ cells within *Prdm13*+*Cck*+ DMH neuronal population during SD was  
415 significantly higher than those in SD-Cont in young mice (**Fig. 7e right**), but not  
416 *Prdm13*+*Cck*- DMH neuronal population (**Fig. 7e left**). Thus, the specific neuronal

417 population expressing both *Prdm13* and *Cck* is activated in response to SD. Unexpectedly,  
418 the percentage of *cFos*<sup>+</sup> cells within *Prdm13*<sup>+</sup>*Cck*<sup>+</sup> DMH neuronal population during SD  
419 in old mice was also significantly higher than those in SD-Cont (**Fig. 7f**). However, the  
420 degree of increase in *cFos*<sup>+</sup> in response to SD in young mice (2.0-fold) noticeably dropped  
421 in old mice (1.5-fold). Furthermore, the level of *Cck* in the hypothalamus of old mice was  
422 significantly lower compared with young mice (**Supplementary Fig. 7c**), and the number  
423 of *Prdm13*<sup>+</sup> DMH cells that highly expressed *Cck* in old mice tended to be lower than  
424 young mice (**Supplementary Fig. 7d**). Therefore, decreased level of *Cck* expression in  
425 the DMH might affect sleep-wake patterns in old mice, and these effects might occur with  
426 affecting neuronal activation and another neuronal event.

427

## 428 **Discussion**

429 We demonstrated that *Prdm13* signaling in the DMH is responsible for the remarkable  
430 effect of DR against age-associated sleep fragmentation and excessive sleepiness during  
431 SD in mice. Consistently, in humans, two years of 25% DR promoted better sleep quality  
432 reflected by lower scores reported on the Pittsburgh Sleep Quality Index compared with  
433 the AL group<sup>29</sup>. Another study showed that two days of 10% DR significantly increased  
434 the duration of stage 4 deep NREM sleep<sup>30</sup>. Our study revealed that the deficiency of  
435 *Prdm13* signaling promotes phenotypes similar to age-associated sleep-wake alterations,  
436 but overexpression of *Prdm13* in the DMH of old mice mitigates those age-associated sleep  
437 changes. Thus, enhancing *Prdm13* signaling in the DMH might be beneficial not only to  
438 prevent age-associated sleep alterations, but also to ameliorate age-associated  
439 pathophysiologies in old animals. Further elucidating detailed downstream molecular

440 events regulated by *Prdm13* signaling and characteristics of *Prdm13*<sup>+</sup> DMH neurons will  
441 be of great interest to explore a potential intervention on age-associated sleep-wake  
442 patterns.

443

444 A potential mechanism by which *Prdm13* signaling in the DMH controls sleep  
445 fragmentation and excessive sleepiness during SD is the transcriptional regulation of  
446 neuropeptides in the DMH. In particular, *Cck* transcription is downregulated within the  
447 hypothalamus of old mice. Optogenetic and chemogenetic studies show that activation of  
448 GABAergic/*Cck*<sup>+</sup> neurons in the preoptic area of the hypothalamus promotes NREM  
449 sleep<sup>31</sup>. Similarly, the activation of glutamatergic/*Cck*<sup>+</sup> neurons in the periculomotor  
450 region of the midbrain also promotes NREM sleep likely through the activation of  
451 GABAergic neurons in the preoptic area of the hypothalamus. Together, it is likely that  
452 activation of *Cck*<sup>+</sup> neurons in the preoptic area of the hypothalamus and the periculomotor  
453 region of the midbrain promotes sleep. Young DMH-*Prdm13*-KO mice display excessive  
454 sleepiness during SD to the extent equivalent to old mice. Because sleep fragmentation is  
455 further developed with age, it is conceivable that the decreased function of *Prdm13*  
456 signaling causes excessive sleepiness during SD, and then sleep fragmentation. The  
457 detailed mechanisms by which the deficiency of *Prdm13* leads to sleep fragmentation still  
458 need to be elucidated in future studies.

459

460 At young age, DMH-*Prdm13*-KO mice display sleep fragmentation and excessive  
461 sleepiness during SD, mimicking sleep changes observed in old wild-type mice. In addition,  
462 DMH-*Prdm13*-KO mice show exacerbated sleep fragmentation and develop other

463 physiological changes such as increased adiposity and decreased wheel-running activity  
464 over age. The reason for DMH-*Prdm13*-KO mice to show changes primarily in sleep, and  
465 secondarily in body weight and physical activity at older age is currently unknown. One  
466 possibility is that prolonged sleep fragmentation induces low physical activity and  
467 increased adiposity. To support this idea, it has been reported that 20 days of sleep  
468 fragmentation during the light period promotes a decreased physical activity in young  
469 mice<sup>9</sup>. In humans, low sleep efficiency, a widely recognized index of sleep consolidation  
470 and fragmentation, is significantly associated with the reduction in daytime physical  
471 activity<sup>32,33</sup>. Therefore, the low physical activity observed in old DMH-*Prdm13*-KO mice  
472 might be a consequence of chronic sleep fragmentation. Similar to physical activity,  
473 obesity is also promoted by sleep fragmentation through an increased food intake in  
474 mice<sup>10,24</sup>, but old DMH-*Prdm13*-KO mice do not alter their food intake. Therefore, the  
475 increased adiposity in old DMH-*Prdm13*-KO mice might be a consequence of low physical  
476 activity.

477

478 In this study, we examined age-associated changes in sleep-wake patterns, EEG spectra  
479 and responsiveness to SD. Consistent with previous reports<sup>2-4,7</sup>, we confirmed that old mice  
480 showed reduced total amount of wakefulness and increased NREM sleep during a 24-hour  
481 period. Such differences are more pronounced during the dark period, but we also observed  
482 differences during the light period. Such differences could be due to a sexual dimorphism  
483 in sleep-wake patterns<sup>34</sup> because our study mainly used female mice for sleep analysis,  
484 whereas other studies have used male mice<sup>2-4,7</sup>. Nonetheless, our findings in this study  
485 implicate an important possibility that old mice are more susceptible to accumulate sleep

486 pressure compared with young mice. In fact, the level of SWA after SD, which reflects  
487 accumulated sleep pressure from increased wakefulness, in old mice was significantly  
488 higher than young mice. Indeed, our finding is consistent with a notion that old mice live  
489 under a high sleep pressure<sup>3</sup>. Since the homeostatic sleep response is fairly intact with age,  
490 accumulation and generation of sleep pressure in old mice might be greater than in young  
491 mice. However, there are clear discrepancies between mice and humans in sleep studies<sup>35</sup>.  
492 It should be noted that some of the age-associated sleep alterations such as sleep  
493 fragmentation are conserved in both mice and human, whereas basic sleep architecture is  
494 quite different between each other (e.g., polyphasic vs. monophasic sleep, nocturnal vs.  
495 diurnal). In most reports, aged mice show an increase in total NREM sleep in the dark  
496 period<sup>2-4,7</sup>, but older humans show a decrease<sup>3,4</sup>. In this regard, it is interesting that a most  
497 recent study has reported that a recessive mutation to the human PRDM13 gene causes  
498 ataxia with cerebellar hypoplasia and delayed puberty with hypogonadotropic  
499 hypogonadism<sup>36</sup>. Recent GWAS study revealed that PRDM13 is listed as one of the  
500 potential nocturnal enuresis risk genes<sup>37</sup>. It remains unclear whether these patients also  
501 have sleep defects. Thus, while mice are useful for modeling certain aspects of aging and  
502 sleep, an extra caution will be necessary in extrapolating the results obtained from mice to  
503 humans.

504

505 We discovered Prdm13 signaling in the DMH affects sleep-wake patterns during the aging  
506 process. We also uncovered that Prdm13 signaling is necessary to promote DR effects in  
507 age-associated sleep patterns and restoration of Prdm13 in the DMH ameliorates age-  
508 associated sleep alterations. Our study also elucidated that Prdm13 acts as a transcription

509 factor that regulates the expression of critical neuropeptides in the DMH. Among those  
510 neuropeptides, *Cck* is most likely involved in the regulation of age-associated sleep-wake  
511 pattern changes mediated by *Prdm13* functioning as a transcription factor in the DMH.  
512 Other downstream target genes of *Prdm13* may also potentially be involved in the age-  
513 associated regulation of sleep-wake patterns. The detailed relationship between the activity  
514 of *Prdm13*+ DMH neurons and *Prdm13* signaling itself still need to be elucidated in the  
515 future studies.

516

### 517 **Acknowledgements**

518 A.S. is supported by grants JSPS KAKENHI (17H07417, JP18H03186, 20K21780), the  
519 Japan Agency for Medical Research and Development (AMED) (JP20gm5010001s0604),  
520 the Sleep Medicine Foundation, the Takeda Science Foundation, and the Research Fund  
521 for Longevity Sciences from the NCGG (28–47). S.T. (1st author) is supported by a grant  
522 from Suntory Foundation for Life Science. M.W. and N.R. are supported by a grant NIH  
523 P50 HD103525 to the Washington University Intellectual and Developmental Disabilities  
524 Research Center. S.I. is supported by grants from the National Institute on Aging  
525 (AG037457, AG047902) and the Tanaka Fund at Washington University School of  
526 Medicine and also by AMED (JP20gm5010002s0003) at the IBRI. K.N. is supported by  
527 grants from AMED (JP20gm5010002s0304) and JST Moonshot R&D (JPMJMS2023).

528

### 529 **Contributions**

530 Conceptualization, S.T., C.S.B., R.Y., Y.T., S.I. and A.S.; Methodology, S.T., C.S.B., R.Y.,  
531 Y.T., H.T., N.R., S.M., J.A., Y.K., K.N., N.O., S.T., S.T., S.I. and A.S.; Investigation, S.T.,

532 R.Y. and A.S. conducted most of experiments, C.S.B. conducted experiments necessary  
533 for Fig. 3b,6a,6b,6d, H.T. conducted experiments necessary for Supplementary Fig. 2d-f;  
534 Writing- Original Draft, S.T. and A.S.; Writing- Review & Editing; C.S.B., N.R., K.N.,  
535 M.W. and S.I. All other authors also contributed to the final manuscript.

536

### 537 **Competing interests**

538 S.I. receives a part of patent-licensing fees from MetroBiotech (USA), Teijin Limited  
539 (Japan), and the Institute for Research on Productive Aging (Japan) through Washington  
540 University. All other authors declare no competing interest.

541

### 542 **References**

- 543 1 Foley, D. J. *et al.* Sleep complaints among elderly persons: an epidemiologic  
544 study of three communities. *Sleep* **18**, 425-432, doi:10.1093/sleep/18.6.425  
545 (1995).
- 546 2 Soltani, S. *et al.* Sleep-Wake Cycle in Young and Older Mice. *Front Syst*  
547 *Neurosci* **13**, 51, doi:10.3389/fnsys.2019.00051 (2019).
- 548 3 Panagiotou, M., Vyazovskiy, V. V., Meijer, J. H. & Deboer, T. Differences in  
549 electroencephalographic non-rapid-eye movement sleep slow-wave  
550 characteristics between young and old mice. *Sci Rep* **7**, 43656,  
551 doi:10.1038/srep43656 (2017).
- 552 4 McKillop, L. E. *et al.* Effects of Aging on Cortical Neural Dynamics and Local  
553 Sleep Homeostasis in Mice. *J Neurosci* **38**, 3911-3928,  
554 doi:10.1523/JNEUROSCI.2513-17.2018 (2018).
- 555 5 Mander, B. A., Winer, J. R. & Walker, M. P. Sleep and Human Aging. *Neuron* **94**,  
556 19-36, doi:10.1016/j.neuron.2017.02.004 (2017).
- 557 6 Carskadon, M. A., Brown, E. D. & Dement, W. C. Sleep fragmentation in the  
558 elderly: relationship to daytime sleep tendency. *Neurobiol Aging* **3**, 321-327,  
559 doi:10.1016/0197-4580(82)90020-3 (1982).
- 560 7 Wimmer, M. E. *et al.* Aging in mice reduces the ability to sustain sleep/wake  
561 states. *PLoS One* **8**, e81880, doi:10.1371/journal.pone.0081880 (2013).
- 562 8 Naidoo, N., Ferber, M., Master, M., Zhu, Y. & Pack, A. I. Aging impairs the  
563 unfolded protein response to sleep deprivation and leads to proapoptotic  
564 signaling. *J Neurosci* **28**, 6539-6548, doi:10.1523/JNEUROSCI.5685-07.2008  
565 (2008).



- 566 9 He, J., Kastin, A. J., Wang, Y. & Pan, W. Sleep fragmentation has differential  
567 effects on obese and lean mice. *J Mol Neurosci* **55**, 644-652,  
568 doi:10.1007/s12031-014-0403-7 (2015).
- 569 10 Hakim, F. *et al.* Chronic sleep fragmentation during the sleep period induces  
570 hypothalamic endoplasmic reticulum stress and PTP1b-mediated leptin  
571 resistance in male mice. *Sleep* **38**, 31-40, doi:10.5665/sleep.4320 (2015).
- 572 11 Scammell, T. E., Arrigoni, E. & Lipton, J. O. Neural Circuitry of Wakefulness  
573 and Sleep. *Neuron* **93**, 747-765, doi:10.1016/j.neuron.2017.01.014 (2017).
- 574 12 Zhang, G. *et al.* Hypothalamic programming of systemic ageing involving IKK-  
575 beta, NF-kappaB and GnRH. *Nature* **497**, 211-216, doi:10.1038/nature12143  
576 (2013).
- 577 13 Satoh, A. *et al.* Sirt1 extends life span and delays aging in mice through the  
578 regulation of Nk2 homeobox 1 in the DMH and LH. *Cell Metab* **18**, 416-430,  
579 doi:10.1016/j.cmet.2013.07.013 (2013).
- 580 14 Zhang, Y. *et al.* Hypothalamic stem cells control ageing speed partly through  
581 exosomal miRNAs. *Nature* **548**, 52-57, doi:10.1038/nature23282 (2017).
- 582 15 Yoshida, M. *et al.* Extracellular Vesicle-Contained eNAMPT Delays Aging and  
583 Extends Lifespan in Mice. *Cell Metab* **30**, 329-342 e325,  
584 doi:10.1016/j.cmet.2019.05.015 (2019).
- 585 16 Satoh, A., Brace, C. S., Rensing, N. & Imai, S. Deficiency of Prdm13, a  
586 dorsomedial hypothalamus-enriched gene, mimics age-associated changes in  
587 sleep quality and adiposity. *Aging Cell* **14**, 209-218, doi:10.1111/accel.12299  
588 (2015).
- 589 17 Fontana, L., Partridge, L. & Longo, V. D. Extending healthy life span--from  
590 yeast to humans. *Science* **328**, 321-326, doi:10.1126/science.1172539  
591 (2010).
- 592 18 Gao, Y. J. & Ji, R. R. c-Fos and pERK, which is a better marker for neuronal  
593 activation and central sensitization after noxious stimulation and tissue  
594 injury? *Open Pain J* **2**, 11-17, doi:10.2174/1876386300902010011 (2009).
- 595 19 Brown, R. E., Basheer, R., McKenna, J. T., Strecker, R. E. & McCarley, R. W.  
596 Control of sleep and wakefulness. *Physiol Rev* **92**, 1087-1187,  
597 doi:10.1152/physrev.00032.2011 (2012).
- 598 20 Alam, M. A., Kumar, S., McGinty, D., Alam, M. N. & Szymusiak, R. Neuronal  
599 activity in the preoptic hypothalamus during sleep deprivation and recovery  
600 sleep. *J Neurophysiol* **111**, 287-299, doi:10.1152/jn.00504.2013 (2014).
- 601 21 Kataoka, N., Hioki, H., Kaneko, T. & Nakamura, K. Psychological stress  
602 activates a dorsomedial hypothalamus-medullary raphe circuit driving  
603 brown adipose tissue thermogenesis and hyperthermia. *Cell Metab* **20**, 346-  
604 358, doi:10.1016/j.cmet.2014.05.018 (2014).
- 605 22 Liu, Y. B., Lio, P. A., Pasternak, J. F. & Trommer, B. L. Developmental changes  
606 in membrane properties and postsynaptic currents of granule cells in rat  
607 dentate gyrus. *J Neurophysiol* **76**, 1074-1088, doi:10.1152/jn.1996.76.2.1074  
608 (1996).
- 609 23 Blackwell, B. N., Bucci, T. J., Hart, R. W. & Turturro, A. Longevity, body weight,  
610 and neoplasia in ad libitum-fed and diet-restricted C57BL6 mice fed NIH-31

- 611 open formula diet. *Toxicol Pathol* **23**, 570-582,  
612 doi:10.1177/019262339502300503 (1995).
- 613 24 Wang, Y. *et al.* Chronic sleep fragmentation promotes obesity in young adult  
614 mice. *Obesity (Silver Spring)* **22**, 758-762, doi:10.1002/oby.20616 (2014).
- 615 25 Stephan, F. K. The "other" circadian system: food as a Zeitgeber. *J Biol*  
616 *Rhythms* **17**, 284-292, doi:10.1177/074873040201700402 (2002).
- 617 26 Pendergast, J. S. & Yamazaki, S. The Mysterious Food-Entrainable Oscillator:  
618 Insights from Mutant and Engineered Mouse Models. *J Biol Rhythms* **33**, 458-  
619 474, doi:10.1177/0748730418789043 (2018).
- 620 27 Huang, Y. G. *et al.* The relationship between fasting-induced torpor, sleep, and  
621 wakefulness in laboratory mice. *Sleep* **44**, doi:10.1093/sleep/zsab093  
622 (2021).
- 623 28 Chang, J. C. *et al.* Prdm13 mediates the balance of inhibitory and excitatory  
624 neurons in somatosensory circuits. *Dev Cell* **25**, 182-195,  
625 doi:10.1016/j.devcel.2013.02.015 (2013).
- 626 29 Martin, C. K. *et al.* Effect of Calorie Restriction on Mood, Quality of Life, Sleep,  
627 and Sexual Function in Healthy Nonobese Adults: The CALERIE 2  
628 Randomized Clinical Trial. *JAMA Intern Med* **176**, 743-752,  
629 doi:10.1001/jamainternmed.2016.1189 (2016).
- 630 30 Collet, T. H. *et al.* The Sleep/Wake Cycle is Directly Modulated by Changes in  
631 Energy Balance. *Sleep* **39**, 1691-1700, doi:10.5665/sleep.6094 (2016).
- 632 31 Chung, S. *et al.* Identification of preoptic sleep neurons using retrograde  
633 labelling and gene profiling. *Nature* **545**, 477-481, doi:10.1038/nature22350  
634 (2017).
- 635 32 Lambiase, M. J., Gabriel, K. P., Kuller, L. H. & Matthews, K. A. Temporal  
636 relationships between physical activity and sleep in older women. *Med Sci*  
637 *Sports Exerc* **45**, 2362-2368, doi:10.1249/MSS.0b013e31829e4cea (2013).
- 638 33 Kline, C. E. The bidirectional relationship between exercise and sleep:  
639 Implications for exercise adherence and sleep improvement. *Am J Lifestyle*  
640 *Med* **8**, 375-379, doi:10.1177/1559827614544437 (2014).
- 641 34 Paul, K. N., Dugovic, C., Turek, F. W. & Laposky, A. D. Diurnal sex differences in  
642 the sleep-wake cycle of mice are dependent on gonadal function. *Sleep* **29**,  
643 1211-1223, doi:10.1093/sleep/29.9.1211 (2006).
- 644 35 Campos-Beltran, D. & Marshall, L. Changes in sleep EEG with aging in humans  
645 and rodents. *Pflugers Arch* **473**, 841-851, doi:10.1007/s00424-021-02545-y  
646 (2021).
- 647 36 Whittaker, D. E. *et al.* A recessive PRDM13 mutation results in congenital  
648 hypogonadotropic hypogonadism and cerebellar hypoplasia. *J Clin Invest*  
649 **131**, doi:10.1172/JCI141587 (2021).
- 650 37 Jorgensen, C. S. *et al.* Identification of genetic loci associated with nocturnal  
651 enuresis: a genome-wide association study. *Lancet Child Adolesc Health* **5**,  
652 201-209, doi:10.1016/S2352-4642(20)30350-3 (2021).
- 653 38 Watanabe, S. *et al.* Prdm13 regulates subtype specification of retinal  
654 amacrine interneurons and modulates visual sensitivity. *J Neurosci* **35**, 8004-  
655 8020, doi:10.1523/JNEUROSCI.0089-15.2015 (2015).

- 656 39 Mizuno-Iijima, S. *et al.* Efficient production of large deletion and gene  
657 fragment knock-in mice mediated by genome editing with Cas9-mouse Cdt1  
658 in mouse zygotes. *Methods* **191**, 23-31, doi:10.1016/j.ymeth.2020.04.007  
659 (2021).
- 660 40 Kagoshima, H. *et al.* The *C. elegans* CBFbeta homologue BRO-1 interacts with  
661 the Runx factor, RNT-1, to promote stem cell proliferation and self-renewal.  
662 *Development* **134**, 3905-3915, doi:10.1242/dev.008276 (2007).
- 663 41 Sato, Y. *et al.* A mutation in transcription factor MAFB causes Focal Segmental  
664 Glomerulosclerosis with Duane Retraction Syndrome. *Kidney Int* **94**, 396-  
665 407, doi:10.1016/j.kint.2018.02.025 (2018).
- 666 42 Franken, P., Dijk, D. J., Tobler, I. & Borbely, A. A. Sleep deprivation in rats:  
667 effects on EEG power spectra, vigilance states, and cortical temperature. *Am J*  
668 *Physiol* **261**, R198-208, doi:10.1152/ajpregu.1991.261.1.R198 (1991).
- 669 43 Tada, H. *et al.* Neonatal isolation augments social dominance by altering actin  
670 dynamics in the medial prefrontal cortex. *Proc Natl Acad Sci U S A* **113**,  
671 E7097-E7105, doi:10.1073/pnas.1606351113 (2016).
- 672 44 Satoh, A. *et al.* SIRT1 promotes the central adaptive response to diet  
673 restriction through activation of the dorsomedial and lateral nuclei of the  
674 hypothalamus. *J Neurosci* **30**, 10220-10232, doi:10.1523/JNEUROSCI.1385-  
675 10.2010 (2010).
- 676 45 Nakamura, H. *et al.* Cooperative role of the RNA-binding proteins Hzf and  
677 HuR in p53 activation. *Mol Cell Biol* **31**, 1997-2009, doi:10.1128/MCB.01424-  
678 10 (2011).
- 679

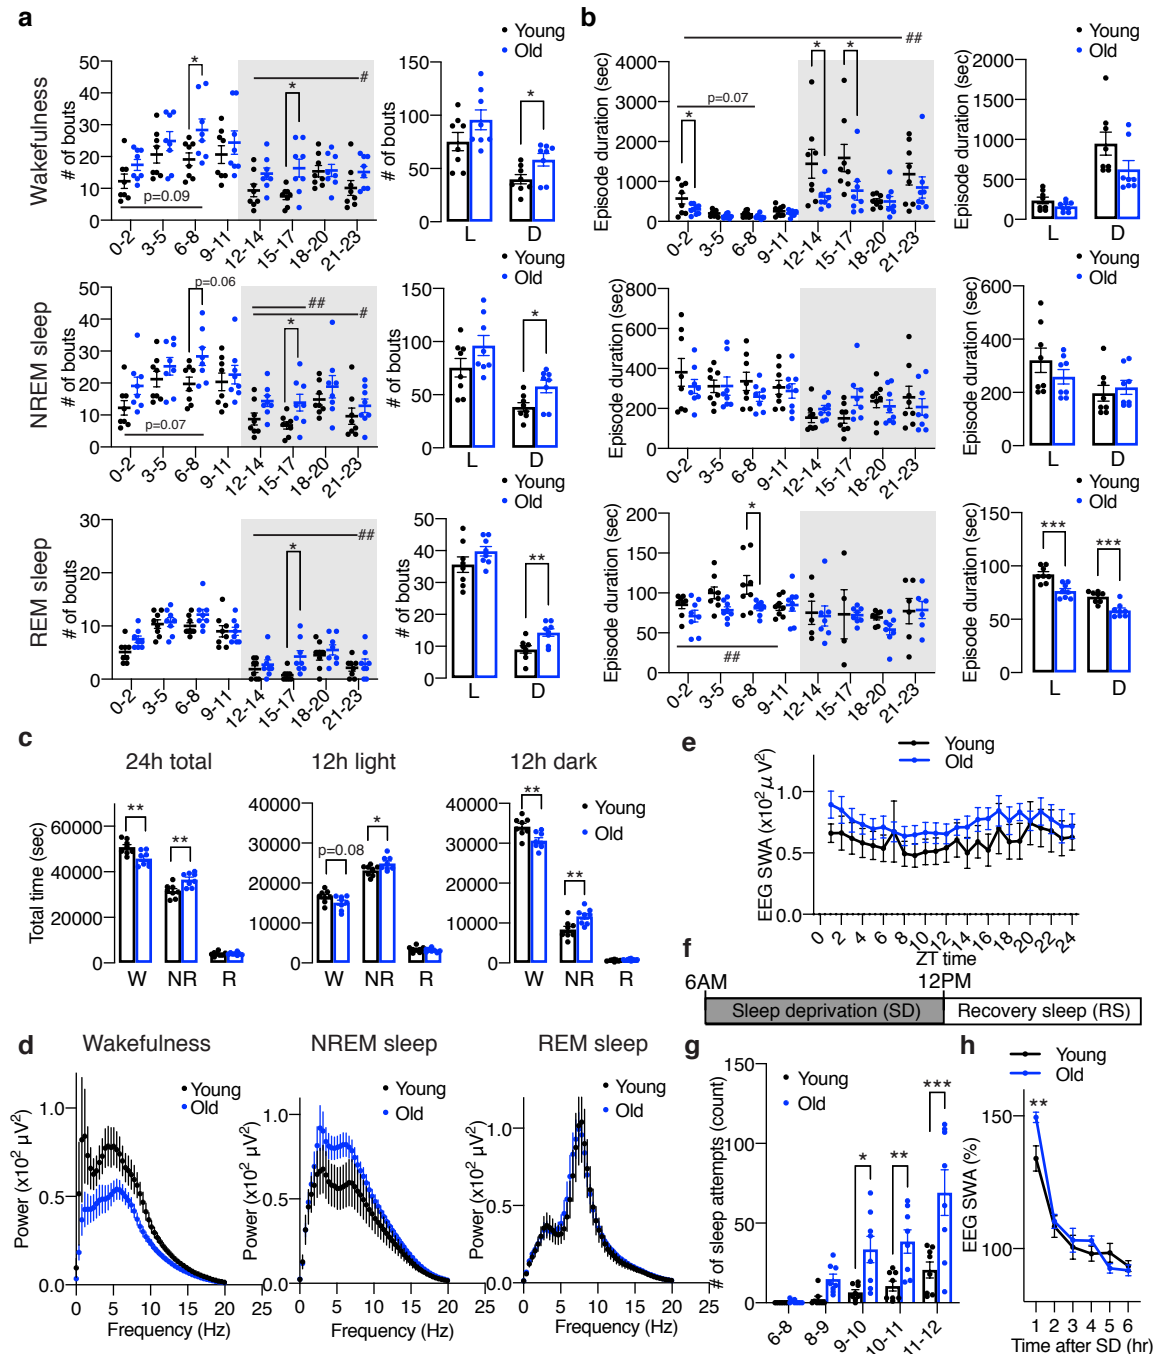

680

681 **Fig. 1: Old C57BL/6J mice display increases in sleep fragmentation and sleep**  
 682 **propensity, low NREM EEG spectra, and excessive sleepiness during SD. a,b.**  
 683 Numbers of episodes (a) and duration (b) of wakefulness (top), NREM sleep (middle) and  
 684 REM sleep (bottom) every 3 hours through a day (left) and during the light (L) and dark  
 685 (D) periods (right) in young and old mice (n=8). Shading indicates dark period. Values are  
 686 shown as means  $\pm$  S.E., #p<0.05 and ##p<0.01 by repeated measures ANOVA, listed p-  
 687 values, \*p<0.05, \*\*p<0.01 and \*\*\*p<0.001 by repeated measures ANOVA with  
 688 Bonferroni's post hoc test (left) or unpaired t-test (right). **c**, Total amount of wakefulness,  
 689 NREM sleep and REM sleep during a 24-hour period (24h total), 12-hour light period (12h

690 light) or 12-hour dark period (12h dark) (n=8). Values are shown as means  $\pm$  S.E., listed  
691 p-values, \*p<0.05 and \*\*p<0.01 by unpaired t-test. **d**, EEG spectra of wakefulness (left),  
692 NREM sleep (middle) and REM sleep (right) during the light period (n=7-8). Values are  
693 shown as means  $\pm$  S.E. **e**, SWA in the range of frequencies between 0.5 to 4 Hz during  
694 NREM sleep for a 24-hour period (n=7-8). Values are shown as means  $\pm$  S.E. **f**, Schematic  
695 of SD. Sleep was deprived for six hours, between 6am and 12pm, followed by a period of  
696 RS. **g**, Number of sleep attempts during SD from 6am to 8am (6-8), 8am to 9am (8-9), 9am  
697 to 10am (9-10), 10am to 11am (10-11) and 11am to 12pm (11-12) in young and old mice  
698 (n=8). Values are shown as means  $\pm$  S.E., \*p<0.05, \*\*p<0.01 and \*\*\*p<0.001 by repeated  
699 measures ANOVA with Bonferroni's post hoc test. **h**, SWA after SD in young and old mice  
700 (n=8). Each value is relative to the average of the 24-hour baseline day. Values are shown  
701 as means  $\pm$  S.E., \*\*p<0.01 by repeated measures ANOVA with Bonferroni's post hoc test.

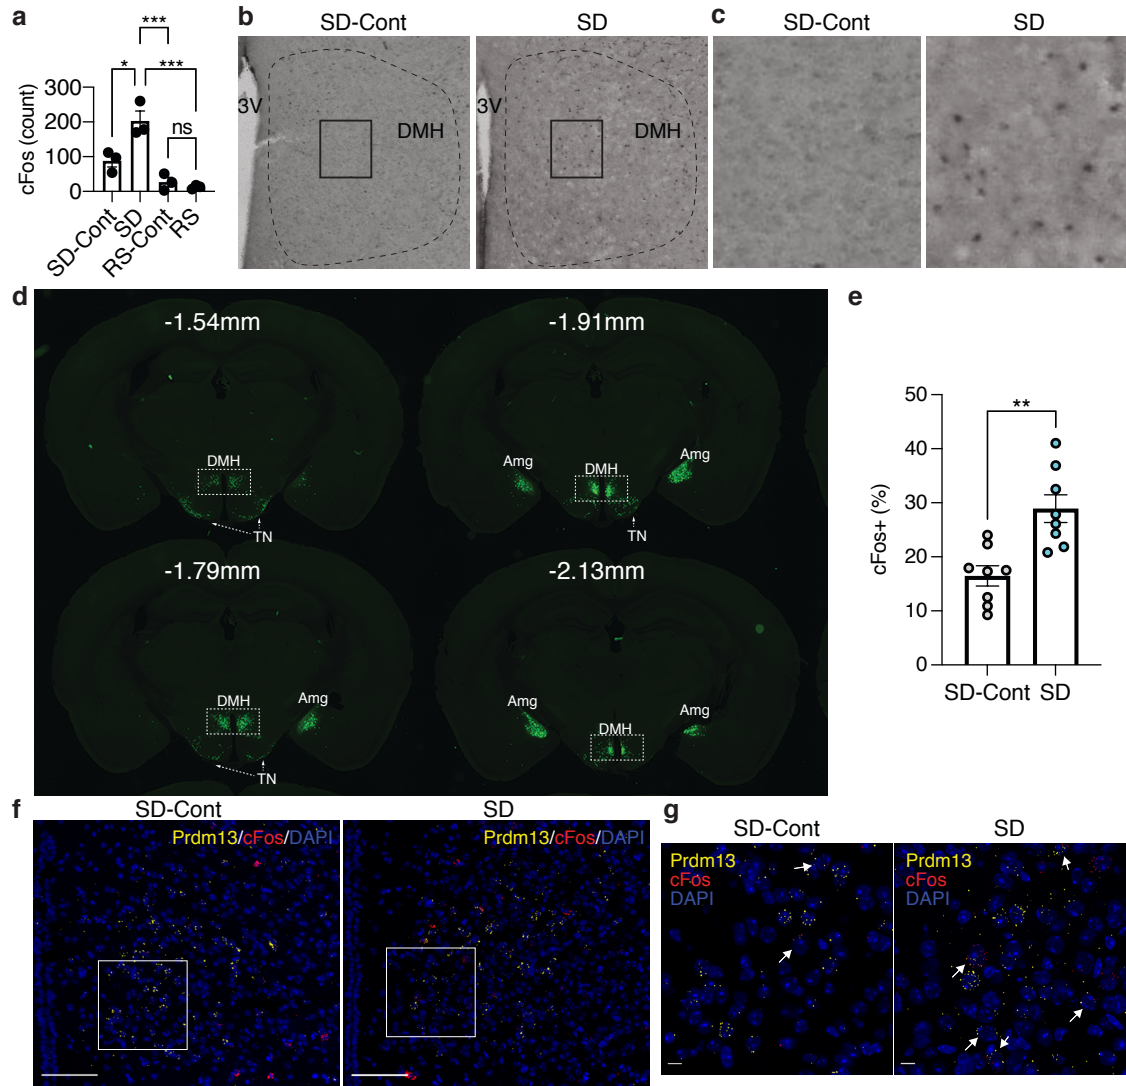

702

703 **Fig. 2: Prdm13<sup>+</sup> neurons in the DMH are activated during SD.** **a**, Numbers of cFos<sup>+</sup>  
704 cells in the DMH during SD, RS and sleeping-control (SD-Cont, RS-Cont) detected by  
705 cFos immunohistochemistry. The total number of cFos<sup>+</sup> cells in the DMH was counted at  
706 bregma -1.67 mm to, -1.79 mm and -1.91 mm and summed up (total three sections) each  
707 mouse (n=3). The third ventricle (3V) is shown. Values are shown as means ± S.E.,  
708 \*p<0.05, \*\*\*p<0.001, and non-significant (ns) by one-way ANOVA with Bonferroni's  
709 post hoc test. **b,c**, Representative images of DMH sections at bregma -1.67 mm from mice  
710 under SD-Cont (left) and SD (right) with cFos. Boxed areas were shown at high  
711 magnification in **c**. **d**, Images of the ZsGreen signal including the DMH, amygdala (Amg)  
712 and tuberal nucleus (TN) at bregma -1.54, -1.79, -1.91 and -2.13 mm of *Prdm13*-ZsGreen  
713 mice. **e**, Ratios of cFos<sup>+</sup> cells within *Prdm13*<sup>+</sup> cells in young mice during SD and SD-  
714 Cont detected by RNAscope *in situ* hybridization (n=7-8). Values are shown as means ±  
715 S.E., \*p<0.05 and \*\*p<0.01 by two-way ANOVA with Bonferroni's post hoc test. **f,g**,  
716 Representative images of DMH sections from young mice under SD-Cont (left) and SD  
717 (right) with *Prdm13* (yellow) and cFos (red) visualized by RNAscope. Boxed areas were

718 shown at high magnification in **g**. Cells were counterstained with DAPI (blue). Scale bars  
719 indicate 100 and 10  $\mu\text{m}$  (**f** and **g**, respectively).

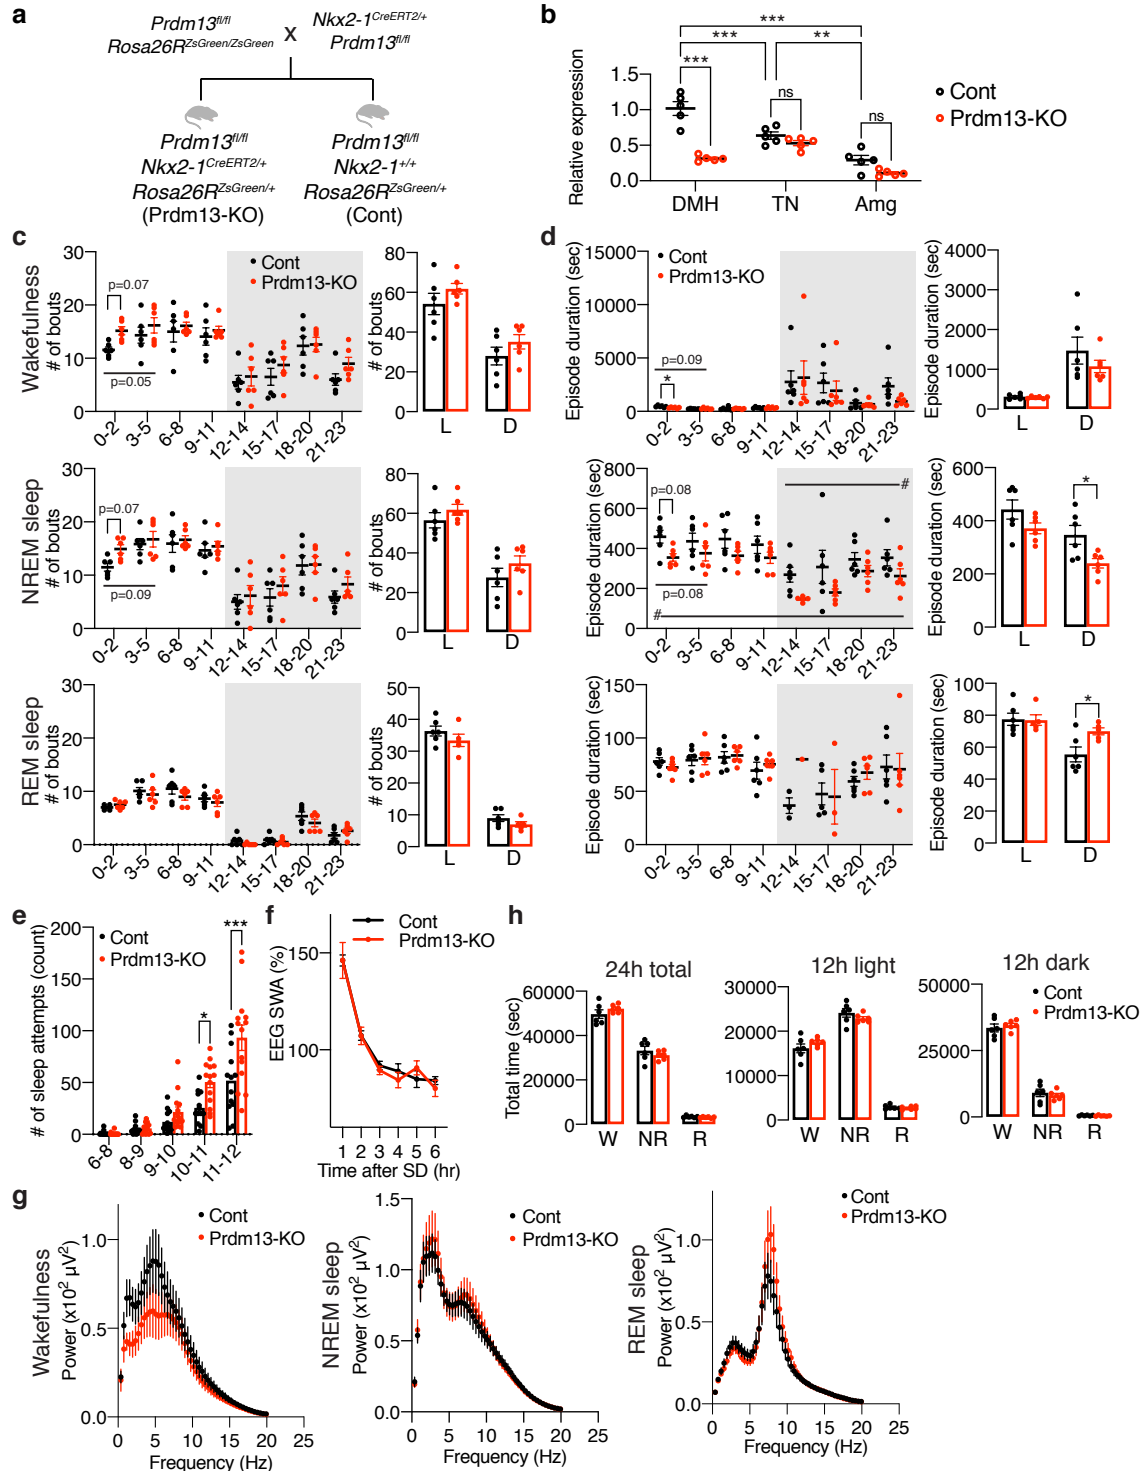

720  
721  
722  
723  
724  
725  
726

**Fig. 3: DMH-specific *Prdm13*-knockout mice display sleep alterations observed in aged C57BL/6J mice.** **a**, Breeding strategy to generate DMH-specific *Prdm13*-knockout (Prdm13-KO) mice. After crossing  $Prdm13^{fl/fl}; Rosa26R^{ZsGreen/ZsGreen}$  mice and  $Nkx2-1^{CreERT2/+}; Prdm13^{fl/fl}$  mice,  $Prdm13^{fl/fl}; Nkx2-1^{CreERT2/+}; Rosa26R^{ZsGreen/+}$  mice were used as Prdm13-KO mice and  $Prdm13^{fl/fl}; Nkx2-1^{+/+}; Rosa26R^{ZsGreen/+}$  mice were used as control (Cont) mice. **b**, Expression of *Prdm13* in the DMH, tuberal nucleus (TN) and amygdala



727 (Amg) of Prdm13-KO and Cont mice (n=5). Values are shown as means  $\pm$  S.E., \*\*p<0.01,  
728 \*\*\*p<0.001 and non-significant (ns) by two-way ANOVA with Bonferroni's post hoc test.  
729 **c,d**, Number of episodes (**c**) or duration (**d**) of wakefulness (top), NREM sleep (middle)  
730 and REM sleep (bottom) every 3 hours through a day (left) and during the light (L) and  
731 dark (D) periods (right) in Prdm13-KO and Cont mice. Shading indicates dark period (n=6).  
732 Values are shown as means  $\pm$  S.E., #p<0.05 by repeated measures ANOVA, listed p-values  
733 and \*p<0.05 by repeated measures ANOVA with Bonferroni's post hoc test (left) or  
734 unpaired t-test (right). **e**, Number of sleep attempts during SD from 6am to 8am (6-8), 8am  
735 to 9am (8-9), 9am to 10am (9-10), 10am to 11am (10-11) and 11am to 12pm (11-12) in  
736 Prdm13-KO and Cont mice (n=13-14). Values are shown as means  $\pm$  S.E., \*p<0.05,  
737 \*\*\*p<0.001 by repeated measures ANOVA with Bonferroni's post hoc test. **f**, SWA during  
738 NREM sleep after SD. Normalized power is relative to the average of the 24-hour baseline  
739 day each group (n=6). Values are shown as means  $\pm$  S.E. **g**, Total amount of wakefulness,  
740 NREM sleep and REM sleep during a 24-hour period (24h total), 12-hour light period (12h  
741 light) or 12-hour dark period (12h dark) (n=6). Values are shown as means  $\pm$  S.E. **h**, EEG  
742 spectra of wakefulness (left), NREM sleep (middle) and REM sleep (right) during the light  
743 period (n=5-6). Values are shown as means  $\pm$  S.E.

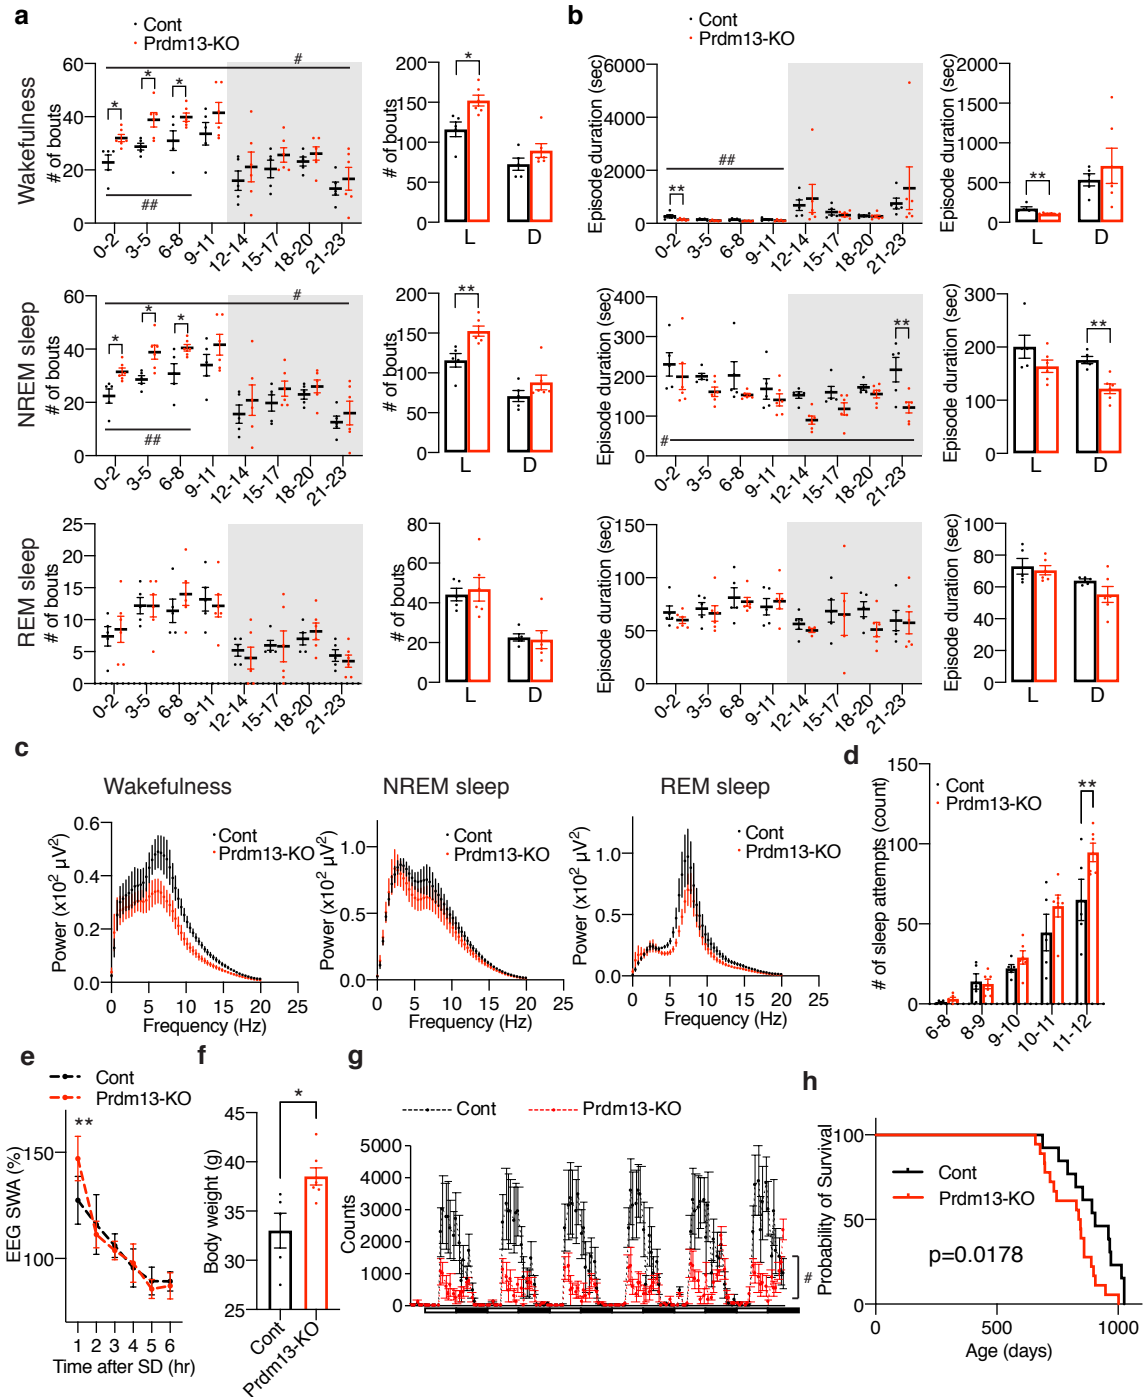

744

745

746 **Fig. 4: Old DMH-Prdm13-KO mice display age-associated pathophysiology and**

747 **shortened lifespan. a,b**, Numbers of episodes (a) and duration (b) of wakefulness (top),

748 NREM sleep (middle) and REM sleep (bottom) every 3 hours through a day (left) and

749 during the light (L) and dark (D) periods (right) in old DMH-specific *Prdm13*-knockout

750 (*Prdm13*-KO) and control (Cont) mice ( $n=5-6$ ). Values are shown as means  $\pm$  S.E., # $p<0.05$

751 ANOVA and ## $p<0.01$  by repeated measures ANOVA, \* $p<0.05$  and \*\* $p<0.01$  by repeated measures

752 ANOVA with Bonferroni's post hoc test (left) or unpaired t-test (right). **c**, EEG spectra of

wakefulness (left), NREM sleep (middle) and REM sleep (right) during the light period

753 (n=4-6). Values are shown as means  $\pm$  S.E. **d**, Number of sleep attempts during SD from  
754 6am to 8am (6-8), 8am to 9am (8-9), 9am to 10am (9-10), 10am to 11am (10-11) and 11am  
755 to 12pm (11-12) in old Prdm13-KO and Cont mice (n=5-6). Values are shown as means  $\pm$   
756 S.E., \*\*p<0.01 by repeated measures ANOVA with Bonferroni's post hoc test. **e**, SWA  
757 after SD of Prdm13-KO and Cont mice at 20 months of age. Normalized power is relative  
758 to the average of the 24-hour baseline day (n=5-6). Values are shown as means  $\pm$  S.E.,  
759 \*\*p<0.01 by Bonferroni's post hoc test. **f**, Body weight of old Prdm13-KO and Cont mice  
760 (n=5-7). Values are shown as means  $\pm$  S.E., \*p<0.05 by unpaired t-test. **g**, The level of  
761 wheel-running activity in old Prdm13-KO and Cont mice for six consecutive days (n=5-7).  
762 Values are shown as means  $\pm$  S.E., #p<0.05 by repeated measures ANOVA. **h**, Kaplan-  
763 Meier curves of Prdm13-KO and Cont mice (n=13-18). Listed p-value was calculated by  
764 log-rank test.

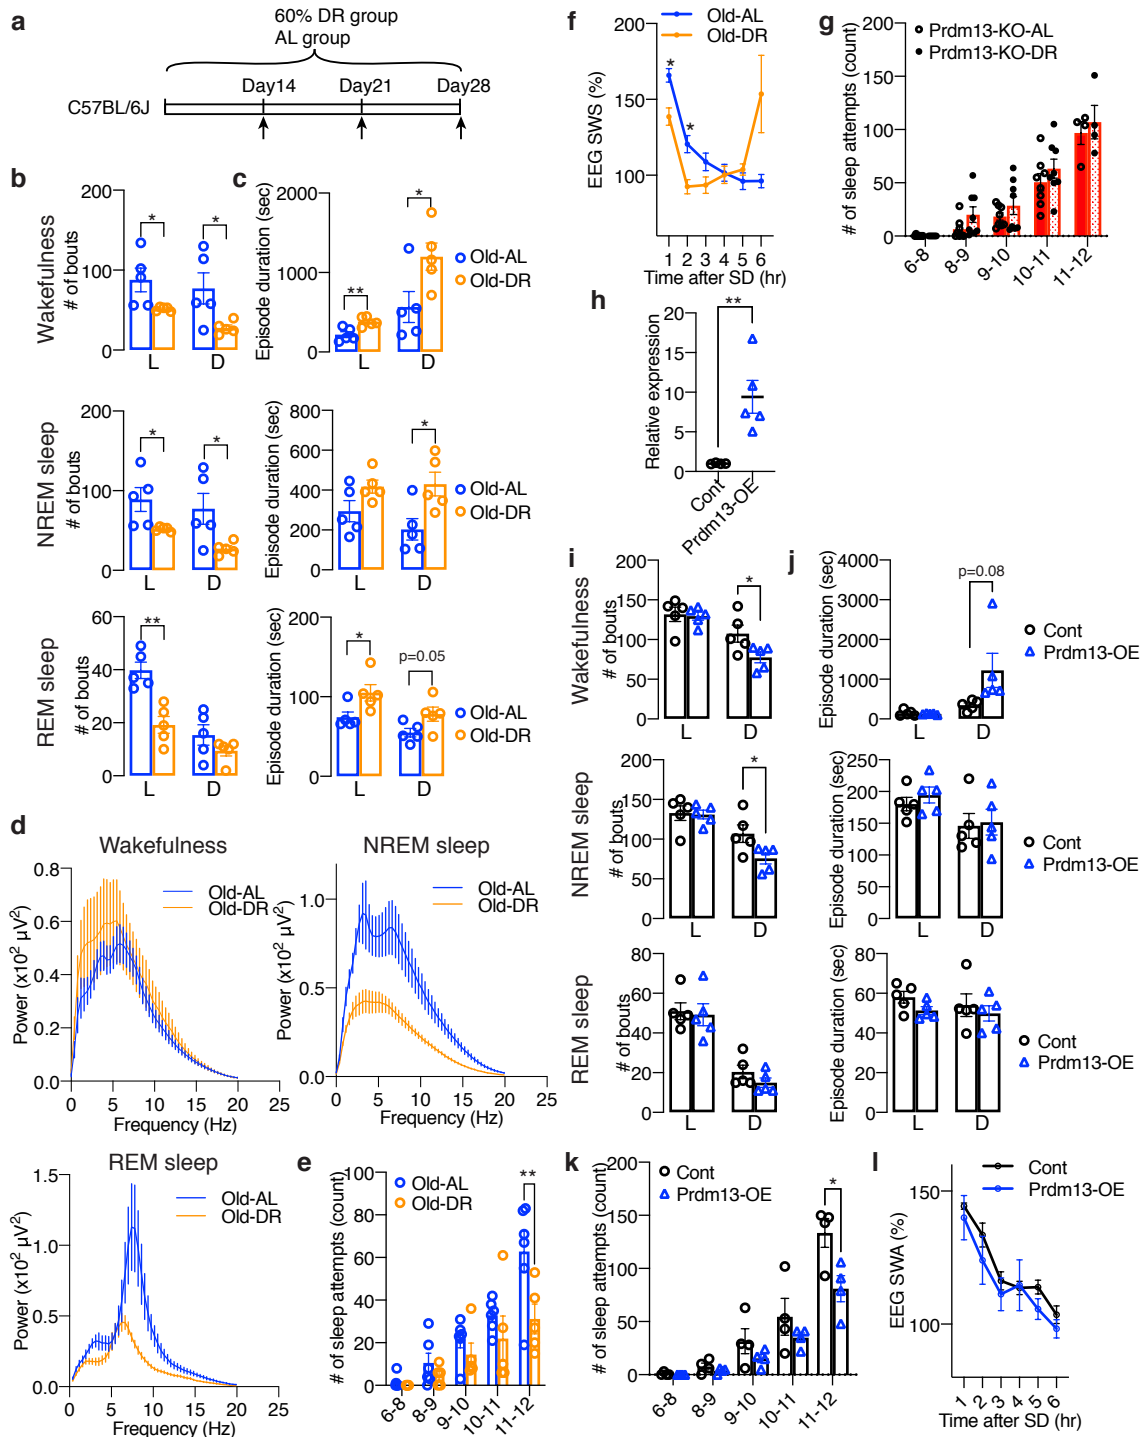

765  
766  
767  
768  
769  
770  
771

**Fig. 5: DR and overexpression of *Prdm13* in the DMH ameliorates age-associated sleep fragmentation and excessive sleepiness during SD.** **a**, DR paradigm in C57BL/6J at 20 months of age. Mice at 20-months-old were fed under 60% diet or AL-diet for 14 to 28 days. **b,c**, Number of episodes (**b**) and duration (**c**) of wakefulness (top), NREM sleep (middle) and REM sleep (bottom) during the light (L) and dark (D) periods in AL and DR mice at 20 months of age (n=5). Values are shown as means  $\pm$  S.E., listed p-value, \*p<0.05

772 and  $**p < 0.01$  by unpaired t-test. **d**, EEG spectra of wakefulness (upper left), NREM sleep  
773 (upper right) and REM sleep (lower) during the light period (n=5). Values are shown as  
774 means  $\pm$  S.E. **e**, Number of sleep attempts during SD from 6am to 8am (6-8), 8am to 9am  
775 (8-9), 9am to 10am (9-10), 10am to 11am (10-11) and 11am to 12pm (11-12) in AL and  
776 DR mice at 20 months of age (n=5-6). Values are shown as means  $\pm$  S.E.,  $**p < 0.01$  by  
777 repeated measures ANOVA with Bonferroni's post hoc test. **f**, SWA after SD of AL and  
778 DR mice at 20 months of age. Normalized power is relative to the average of the 24-hour  
779 baseline day (n=5). Values are shown as means  $\pm$  S.E.,  $*p < 0.05$  by Bonferroni's post hoc  
780 test. **g**, Number of sleep attempts during SD from 6am to 8am (6-8), 8am to 9am (8-9),  
781 9am to 10am (9-10), 10am to 11am (10-11) and 11am to 12pm (11-12) in Prdm13-KO-AL  
782 and Prdm13-KO-DR mice (n=8). Values are shown as means  $\pm$  S.E. **h**, Expression of  
783 *Prdm13* in the hypothalamus of *Prdm13*-overexpressing (Prdm13-OE) and control (Cont)  
784 mice (n=4-5). Values are shown as means  $\pm$  S.E.,  $*p < 0.05$  by unpaired t-test. **i,j**, Number  
785 of episodes (**i**) and duration (**j**) of wakefulness (top), NREM sleep (middle) and REM sleep  
786 (bottom) during the light (L) and dark (D) periods in Prdm13-OE and Cont mice (n=5).  
787 Values are shown as means  $\pm$  S.E.,  $*p < 0.05$  by unpaired t-test. **k**, Number of sleep attempts  
788 during SD from 6am to 8am (6-8), 8am to 9am (8-9), 9am to 10am (9-10), 10am to 11am  
789 (10-11) and 11am to 12pm (11-12) in Prdm13-OE and Cont mice (n=4). Values are shown  
790 as means  $\pm$  S.E.,  $*p < 0.05$  by repeated measures ANOVA with Bonferroni's post hoc test.  
791 **l**, SWA after SD of Prdm13-OE and Cont mice. Normalized power is relative to the average  
792 of the 24-hour baseline day (n=4). Values are shown as means  $\pm$  S.E.

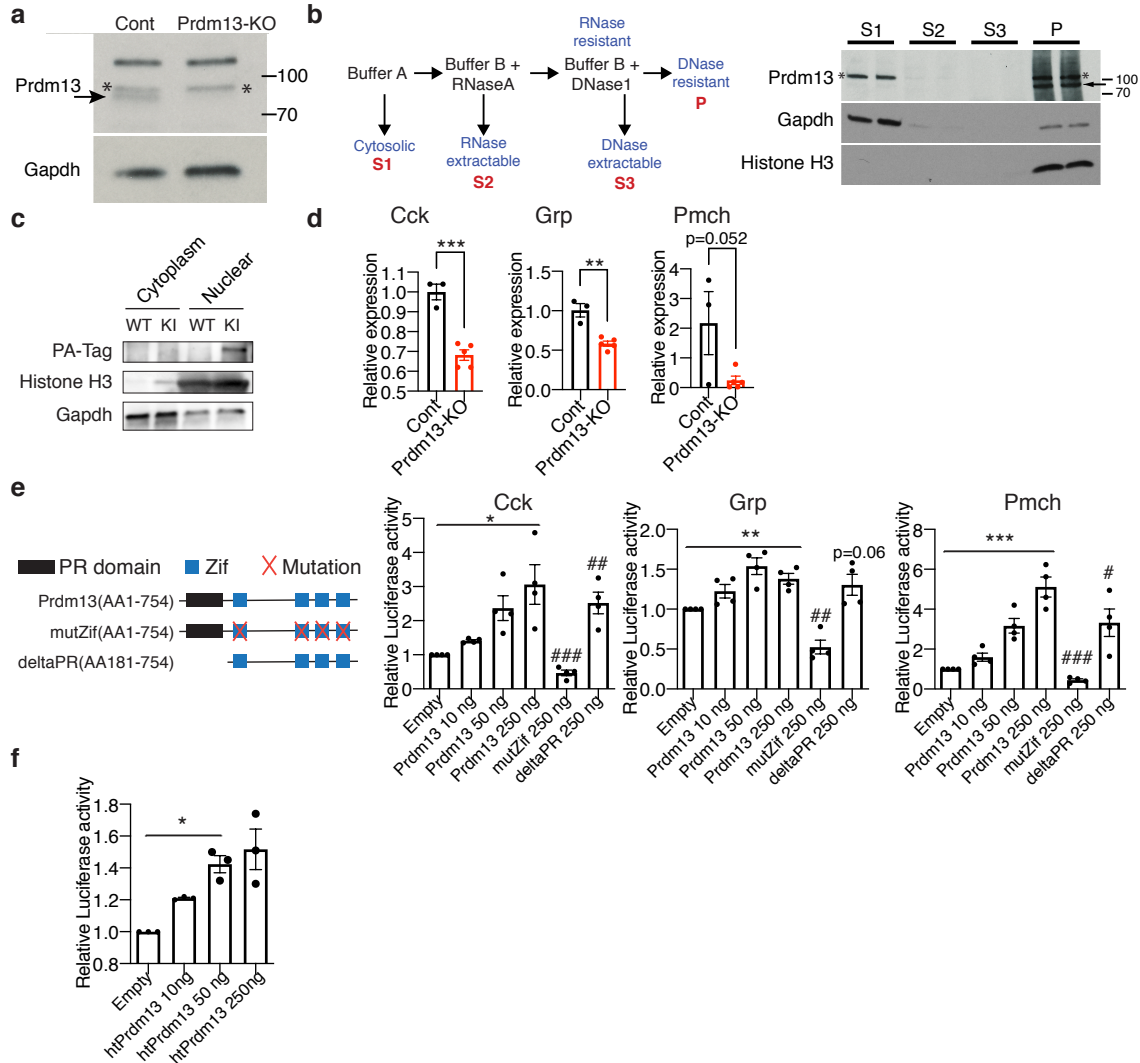

793

794

**Fig. 6: Prdm13 in the DMH is a transcription factor.** **a**, Western blot of Prdm13 in DMH

collected by laser microdissection from DMH-specific Prdm13-KO and Cont mice (n=4

mice/lane). The arrow indicates the band for Prdm13; asterisks (\*) indicate non-specific

bands. **b**, Schematic of fractionation protocol from mouse hypothalami (left). Western blot

of Prdm13 in hypothalamic fractions of C57BL/6J mice (right). Hypothalami from two

C57BL/6J female mice were combined for each lane, and 8% equivalent of each fraction

was run on the gel. Cytosolic supernatant (S1), RNase-extractable supernatant (S2),

DNase-extractable supernatant (S3), and insoluble pellet (P) were run each lane. The arrow

indicates the band for Prdm13; asterisks (\*) indicate non-specific bands. **c**, Western blot of

Prdm13 in hypothalamic fractions of *Prdm13*-PA-Tag (KI) and wild-type (WT) mice.

Cytosolic and nuclear fractions were run each lane as indicated. **d**, Expression of *Cck*, *Grp*

and *Pmch* mRNA in the DMH of DMH-*Prdm13*-KO (Prdm13-KO) and control (Cont)

mice (n=3-5). Values are shown as means  $\pm$  S.E., listed p-value, \*\*p<0.01 and \*\*\*p<0.001

by unpaired t-test. **e**, Transcriptional activity of Prdm13-202 and Prdm13-mutants for the

luciferase reporter vector containing the promoter region of *Cck*, *Grp* and *Pmch*. Schematic

representation of Prdm13-202 and Prdm13-mutants are shown above. NIH3T3 cells were

co-transfected with 250 ng of luciferase reporter plasmid and plasmid expressing Prdm13-

810

811 202 (Prdm13), Prdm13-Zif mutant (mutZif) or Prdm13-deltaPR mutant (deltaPR).  
812 Obtained luminescence was normalized to total protein concentration (n=3, four individual  
813 experiments). Values are shown as means  $\pm$  S.E., listed p-value, \*p<0.05, \*\*p<0.01 and  
814 \*\*\*p<0.001 by one-way ANOVA with Bonferroni's post hoc test, #p<0.05 and ##p<0.01  
815 and ###p<0.001 by unpaired t-test. **f**, Transcriptional activity of hypothalamic Prdm13  
816 (*htPrdm13*) for the luciferase reporter plasmid containing the promoter region of *Cck*.  
817 NIH3T3 cells were co-transfected with 250 ng of reporter plasmid and 10, 50 or 250 ng of  
818 *htPrdm13*-expressing plasmid. Obtained luminescence was normalized to total protein  
819 concentrations (n=3, three individual experiments). Values are shown as means  $\pm$  S.E.,  
820 \*p<0.05 by one-way ANOVA with Bonferroni's post hoc test.  
821  
822

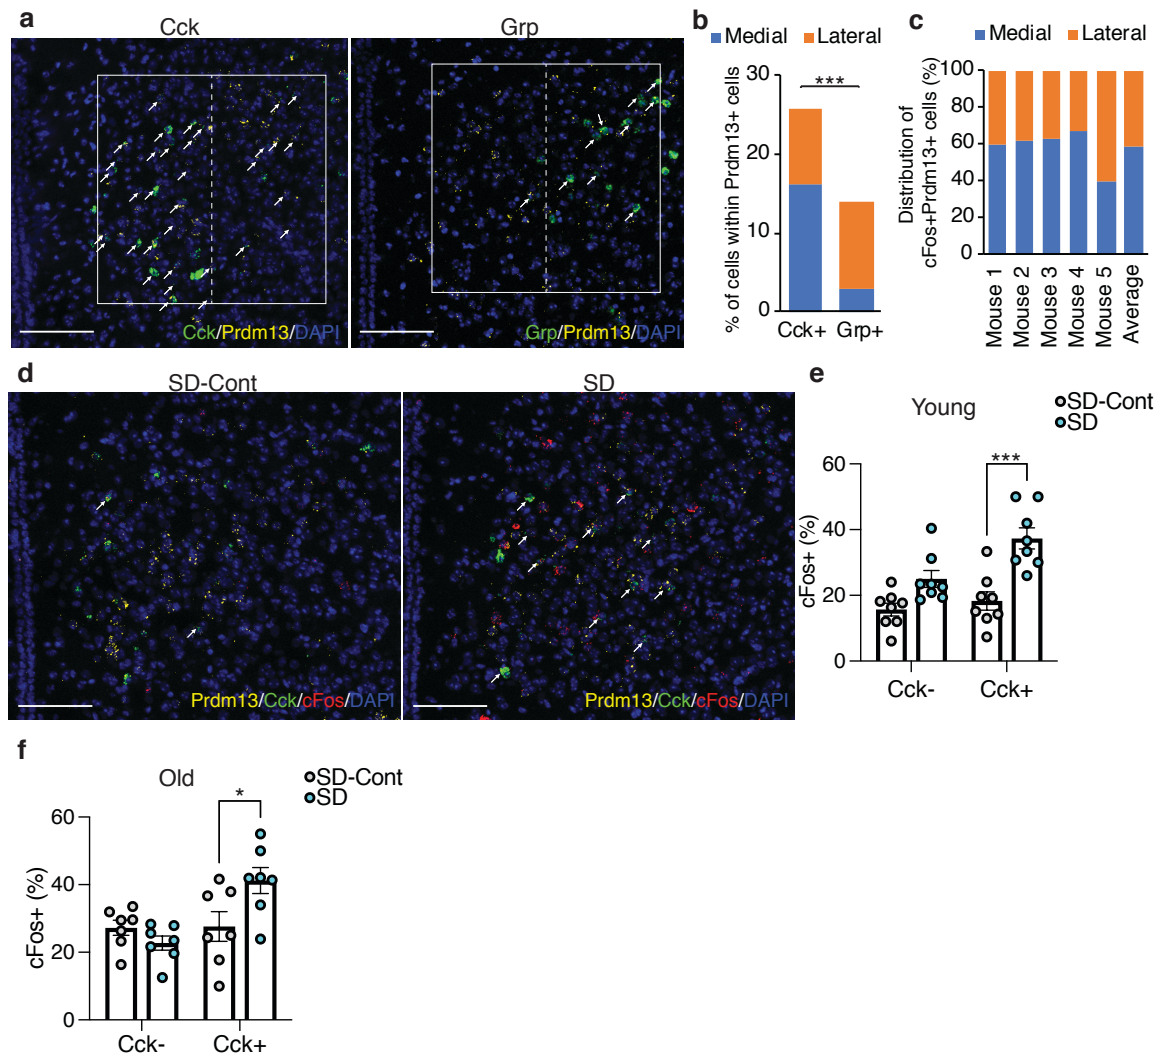

823  
824 **Fig. 7: DMH Prdm13+Cck+ neurons are activated during SD.** **a**, Representative images  
825 of the DMH with *Prdm13* (yellow) and one of the two genes, *Cck* or *Grp* (green) visualized  
826 by RNAscope. Cells were counterstained with DAPI (blue). White boxes show the DMH,  
827 which is divided into medial and lateral areas by dashed lines. White arrows show  
828 yellow+green+ cells. Scale bar indicates 100  $\mu$ m. **b**, Ratios of *Cck*+ or *Grp*+ cells within  
829 *Prdm13*+ cells in medial, lateral or total (medial and lateral) DMH (n=3-5). Values are  
830 shown as means  $\pm$  S.E., \*\*\*p<0.001 by unpaired t-test. **c**, Distribution of *cFos*+*Prdm13*+  
831 cells (n=5). **d**, Representative images of the DMH from young mice under SD-Cont and  
832 SD with *Prdm13* (yellow), *Cck* (green) and *cFos* (red) visualized by RNAscope. Cells were  
833 counterstained with DAPI (blue). White arrows show *Prdm13*+*Cck*+*cFos*+ cells. Scale  
834 bar indicates 100  $\mu$ m. **e,f**, Ratios of *cFos*+ cells within *Prdm13*+*Cck*- (left) or  
835 *Prdm13*+*Cck*+ (right) cells in young (**e**) or old (**f**) mice during SD-Cont and SD (n=7-8).  
836 Values are shown as means  $\pm$  S.E., \*p<0.05, \*\*\*p<0.001 by two-way ANOVA with  
837 Bonferroni's post hoc test.

838  
839  
840



841 **Methods**

842 **Animal models**

843 All mouse experiments and procedures were approved by the Animal Care and Use of the  
844 NCGG. Mice were housed in 12/12-hour light/dark cycle (lights on at 6am and off at 6pm)  
845 with free access to food and water. 1-2 month-old C57BL/6J mice were purchased from  
846 the Charles River Laboratories International, Inc. (Yokohama, Japan), and grew up to 4-6  
847 or 18-20 months of age (as young and old groups, respectively) in our Animal Facility at  
848 the NCGG and aged mice specialized suits at the NCGG. *Rosa26R<sup>ZsGreen/ZsGreen</sup>* and *Nkx2-  
849 I<sup>CreERT2/+</sup>* mice (Jackson stock no: 007906 and 014552) were obtained from Jackson  
850 Laboratory. *Prdm13<sup>fl/fl</sup>* mice (RIKEN BRC stock no: RBRC09371)<sup>38</sup> were obtained from  
851 RIKEN BRC. For DR study, C57BL/6J mice at 20 or 4 months of age or DMH-*Prdm13-  
852 KO* mice at 12 months of age were fed under 60% diet or AL-diet for 28 days. To minimize  
853 habitual stress and disruption of daily pattern, food was gradually decreased to 60% of  
854 daily food intake, and both AL and DR groups were fed daily at 5-6pm right before the  
855 dark period. Mice were closely monitored and included daily body weight measurement  
856 during the experimental period. Female mice were mainly used for sleep studies, wheel-  
857 running analysis, food intake behavior studies, and DR studies. Both male and female mice  
858 were used to confirm excessive sleepiness during SD in DMH-*Prdm13-KO* mice. Only  
859 male mice were used in longevity study and the DR study using DMH-*Prdm13-KO* mice.

860

861 *Prdm13-CreERT2* mice were generated by the Laboratory Animal Resource Center at the  
862 University of Tsukuba. The detailed procedure was described previously<sup>39</sup>. Briefly, a  
863 targeting vector was designed to insert the *Prdm13* sgRNAs (5'-GAC TCC TAA CGC  
864 GCC TTC CA-3') into pX330-mC plasmid, which carried Cas9-mC expression unit<sup>39</sup>  
865 (pX330-mC-*Prdm13*sgRNA). pCreERT2-*Prdm13* was designed to insert a 2A peptide  
866 (P2A), CreER<sup>T2</sup> recombinase, and rabbit globin polyadenylation signal, replacing TAA  
867 stop codon in the fourth exon of *Prdm13* gene. These two constructs (pX330-mC-  
868 *Prdm13*sgRNA and pCreERT2-*Prdm13*) were microinjected into zygotes from C57BL/6J  
869 mice. Subsequently, injected zygotes were transferred into oviducts in pseudopregnant ICR  
870 female mice (Charles River Laboratories International, Inc. Yokohama, Japan), and 85  
871 newborns were obtained. The designed knock-in (KI) mutation was confirmed by PCR  
872 using the following primers: *Prdm13* screening 5Fw: 5'-CAT GCA CAG CAC TTG TGG  
873 TAG AGA AAT C-3', *Prdm13* screening 3Rv: 5'-ATT TAG AAT TGG AGC AAA CAG  
874 GGG GAT T-3'. No random integrations were detected by PCR with primers detecting the  
875 ampicillin resistance gene.

876

877 *Prdm13-PA-Tag* KI mice were generated by the Laboratory Animal Resource Center at  
878 the University of Tsukuba. We attempted to introduce the PA-Tag coding sequence  
879 connected to the LG3-linker sequence just before the TAA stop codon of *Prdm13* gene<sup>40</sup>.  
880 Briefly, the gRNA (5'-AGT CCC TGG AAG GCG CGT T-3') was synthesized and  
881 purified by GeneArt<sup>TM</sup> Precision gRNA Synthesis Kit (Thermo Fisher Scientific). In  
882 addition, we designed a 200-nt single-stranded DNA oligonucleotide (ssODN) donor,  
883 placing the LG3-PA sequence between the genomic regions from 54 bp upstream of the  
884 TAA stop codon to 53 bp downstream of the TAA (Integrated DNA Technologies). The  
885 gRNA, ssODN, and GeneArt<sup>TM</sup> Platinum<sup>TM</sup> Cas9 Nuclease (Thermo Fisher Scientific)  
886 were electroporated to C57BL/6J zygotes using a NEPA 21 electroporator (NEPAGNENE),

887 as described previously<sup>41</sup>. After electroporation, 2-cell embryos were transferred into  
888 oviducts in pseudopregnant ICR female mice, and 32 newborns were obtained. The PA-  
889 Tag KI mutation was confirmed by PCR using the following primers: Prdm13 QC primer  
890 F: 5'-TCA ACA AGC ACA TCC GAC TC-3', Prdm13 QC primer R: 5'-TGA CGT GAT  
891 CCT GAA CCT CA-3'. The PCR products were sequenced by using BigDye Terminator  
892 v3.1 Cycle Sequencing Kit (Thermo Fisher Scientific).

893

### 894 **Sleep analysis**

895 Isoflurane-anesthetized mice were surgically implanted with stainless screw electrodes  
896 placed over the right frontal bone for reference and right/left parietal bone for active  
897 recording electroencephalogram (EEG), and wire electrodes in the nuchal muscle for  
898 electromyogram (EMG) recording. All signals were grounded to a bone screw electrode  
899 placed over the cerebellum midline. Mice were recovered from surgery for three days and  
900 subsequently acclimatized to the recording cage for three weeks. EEG/EMG recording was  
901 performed continuously for 2 consecutive days. Recording electrodes were connected to  
902 TBSI Tethered System T8 amplifier (TBSI) via T8 Headstage (A50-2139-G3, TBSI), a  
903 lightweight cable and commutator to enable free movement and feeding in a sound and  
904 light proof enclosure with a 12/12-hour light/dark cycle. EEG/EMG signals were digitized  
905 at 600 Hz, filtered at 0.3-35 Hz for EEG and 10-100 Hz for EMG by PowerLab system  
906 (ADInstruments). Wireless EEG Logger (ELG-2, Bio research Center) was used for sleep  
907 analysis in Fig. 5i-l. 10-second epochs of EEG/EMG signals were semiautomatically  
908 scored as wakefulness, NREM sleep, and REM sleep by SleepSign (KISSEI COMTEC)  
909 with visual examination. Score was blinded for genotypes during quantification. Spectra  
910 analysis was performed by a FFT (FFT; 0.4-20 Hz, 0.38 Hz resolution). Three outliers were  
911 detected using Grubb's and ROFU tests (Graph Pad Prism 9) (one young mice in Fig. 1,  
912 one KO mouse in Fig. 3, 4) and excluded from spectrum analysis. SWA during NREM  
913 sleep was computed across the 24-hour recording period by SleepSign (KISSEI COMTEC).  
914 SWA after SD was normalized to the average of SWA for the average of 24-hour period  
915 each mouse.

916

### 917 **SD study**

918 Mice were individually housed prior to the experiment. On the day of SD, food was  
919 removed at 6am and mice were kept awake using a long Q-tip until 12pm (6 hours SD) by  
920 gentle touching of mice, as previously reported<sup>42</sup>. Attempts to sleep were determined by  
921 the onset of behaviors typical of sleep such as cornering, curling, and eye closing. Once  
922 such behaviors were observed, we placed the long Q-tip in front of the mouse. One sleep  
923 attempt was counted when the mouse did not react to it. EEG/EMG recording was  
924 performed during SD to monitor the effectiveness of the SD protocol. All animals indicated  
925 <5% of sleep during the six hours of SD. After SD, food was added, and the mice were  
926 allowed to sleep. Genotypes and conditions were blinded during the experimental  
927 procedures.

928

### 929 **Immunohistochemistry and immunofluorescence**

930 Mice were anesthetized with isoflurane and perfused with PBS followed by 4%  
931 paraformaldehyde (PFA) at 11am for SD and SD-Cont, and at 2pm for RS and RS-Cont.  
932 Brains were fixed with 4% PFA overnight and placed into 30% sucrose until saturated.

933 Thirty-micrometer cryosections were collected into PBS and stored in cryoprotectant at  
934  $-20^{\circ}\text{C}$ . For immunofluorescent staining, samples were stained using primary antibodies:  
935 anti-Nkx2-1 (TTF-1) (1:500, ab76013, Abcam) and secondary antibodies. To stain cFos,  
936 samples were stained with anti-cFos (1:1,000, 226003, Synaptic Systems) and universal  
937 biotinylated anti-mouse/rabbit IgG (Universal Elite ABC kit, PK-7200, Vector  
938 laboratories) antibodies with Universal Elite ABC kit and developed with Vector SG  
939 Substrate Kit, Peroxidase (SK-4700, Vector laboratories). The number of cFos-positive  
940 cells was quantified by visual scoring. Genotypes and conditions were blinded during the  
941 experimental procedures.

942

### 943 ***In situ* hybridization**

944 For RNAscope, brains from C57BL/6J mice were dissected, embedded in OCT and frozen  
945 on dry ice. The embedded frozen blocks were cut at  $14\ \mu\text{m}$  thick using cryostat CM1850  
946 (Leica) and mounted on slides. The sections were stored at  $-80^{\circ}\text{C}$  until further processing.  
947 Target mRNA was detected using the RNAscope Multiplex Fluorescent Reagent Kit v2  
948 [Advanced Cell Diagnostics (ACD)]. RNA probes (ACD) used in this study are as follows:  
949 *Prdm13* (Cat# 543551-C2), *Fos* (Cat# 316921-C3), *Cck* (Cat# 402271), *Grp* (Cat# 317861),  
950 and *Pmch* (Cat# 478721). The frozen sections were fixed in pre-chilled 4% PFA in PBS  
951 for 10 min. After 2 times washing with PBS, the sections were dehydrated through 50%,  
952 70%, 100% and 100% ethanol for 5 min each. The slides were air dried for 5min. The  
953 slides were treated with hydrogen peroxide for 10 min at room temperature. Probe  
954 hybridization and signal amplification were performed using TSA Plus kit (PerkinElmer)  
955 according to the ACD's instructions. The slides were counter stained with DAPI and  
956 mounted using 2.5% 1,4-diazabicyclo[2.2.2]octane (DABCO) in 50% glycerol. The slides  
957 were imaged with LSM700 laser-scanning confocal microscope (Zeiss) with ZEN 2009  
958 software (Zeiss). Cells positive for *Prdm13*, *cFos*, *Cck*, *Grp* and *Pmch* were manually  
959 detected. To evaluate *Cck* expression level semiquantitatively, signal dots derived from  
960 *Cck* mRNA were counted manually and categorized into 4 grades: 1 (1-5 dots/ cell), 2 (6-  
961 10 dots/ cell), 3 (11-15 dots/ cell) and 4 ( $>16$  dots/ cell). Genotypes and conditions were  
962 blinded during the experimental procedures.

963

### 964 **Lentivirus production**

965 To generate the *Prdm13*-expressing lentiviral construct, *Prdm13* cDNA was cloned into  
966 the FCIV.FM1 vector (a gift from the Viral Vectors Core at Washington University School  
967 of Medicine). High-titered viruses were generated from the Viral Vectors Core at  
968 Washington University School of Medicine. Briefly, lentiviruses were produced by co-  
969 transfecting HEK293T cells with the *Prdm13*-expressing vectors and three packaging  
970 vectors (pMD-Lg, pCMV-G, and RSV-REV) by the calcium phosphate precipitation  
971 procedure. Six hours after transfection, the medium was replaced with the complete  
972 medium containing 6 mM sodium butyrate. Culture supernatant was collected 42 hours  
973 after transfection. The supernatant was passed through a  $0.45\ \mu\text{m}$  filter, concentrated by  
974 ultracentrifugation through a 20% sucrose cushion, and stored at  $-80^{\circ}\text{C}$  until use. Virus titer  
975 was determined by transducing HT1080 cells and assaying for reporter expression using  
976 flow cytometry.

977

### 978 **Lentivirus injections**

979 Following anesthesia with isoflurane gas, the mouse was placed in a three-point fixation  
980 stereotactic frame. Bregma was identified, and appropriate coordinates for the stereotactic  
981 injection were registered: relative to Bregma for the DMH, anterior-posterior (AP) -1.4  
982 mm, medial-lateral (ML)  $\pm$  0.3 mm, and dorsal ventral (DV) -5.4 mm. A burr hole was  
983 made using a dental drill, and a glass capillary was directed to the previously determined  
984 coordinates. Viruses were slowly injected (100 nL/ 2 min). After the injection, animals  
985 were allowed to recover in a temperature regulated incubator (32°C) until fully awake. All  
986 injected mice had four weeks to fully recover before being used for any experiments.  
987 Viruses with the following titers and volumes were injected: Lentiviruses carrying *Prdm13*  
988 or *fLuc* cDNA ( $2.0 \times 10^8$  IU/mL, 500 nL in the DMH).

989

### 990 **Whole cell patch-clamp electrophysiology**

991 Mice were anesthetized with an isoflurane–oxygen mixture, and the brain was removed.  
992 The brain was quickly transferred into ice-cold dissection buffer (25 mM NaHCO<sub>3</sub>,  
993 1.25 mM NaH<sub>2</sub>PO<sub>4</sub>, 2.5 mM KCl, 0.5 mM CaCl<sub>2</sub>, 7 mM MgCl<sub>2</sub>, 25 mM glucose, 110 mM  
994 choline chloride, 11.6 mM ascorbic acid, 3.1 mM pyruvic acid and 1mM kynurenic acid),  
995 gassed with 5%CO<sub>2</sub>/95%O<sub>2</sub>. Coronal brain slices were cut (300  $\mu$ m; Leica VT1200S) in  
996 dissection buffer. The slices were then incubated in physiological solution (118 mM NaCl,  
997 2.5 mM KCl, 26 mM NaHCO<sub>3</sub>, 1 mM NaH<sub>2</sub>PO<sub>4</sub>, 10 mM glucose, 4 mM MgCl<sub>2</sub>, 4 mM  
998 CaCl<sub>2</sub>, pH 7.4, gassed with 5%CO<sub>2</sub>/95%O<sub>2</sub>).

999

1000 Patch recording pipettes (3–7 M $\Omega$ ) were filled with intracellular solution (115 mM cesium  
1001 methanesulfonate, 20 mM CsCl, 10 mM HEPES, 2.5 mM MgCl<sub>2</sub>, 4 mM Na<sub>2</sub>ATP, 0.4 mM  
1002 Na<sub>3</sub>GTP, 10 mM sodium phosphocreatine and 0.6 mM EGTA at pH 7.25). To record the  
1003 mEPSC (–60 mV holding potential) or mIPSC (0 mV holding potential), the recording  
1004 chamber was perfused with physiological solution with 0.5  $\mu$ M TTX. Whole-cell  
1005 recordings were obtained from *Prdm13*<sup>+</sup> neurons of the DMH with a Multiclamp 700B  
1006 (Axon Instruments). Cells with membrane resistance > 100 M $\Omega$  and series resistance < 20  
1007 M $\Omega$  were only recorded. Whole-cell patch-clamp data were collected with Clampex and  
1008 analyzed using Clampfit 10.7 software (Axon Instruments)<sup>43</sup>.

1009

### 1010 **Identification of 5'-end of htPrdm13 cDNA from mouse hypothalami**

1011 We performed 5'-rapid amplification of cDNA-ends (5'-RACE)-PCR analyses to determine  
1012 the 5' end of htPrdm13 transcripts in RNAs isolated from the hypothalamus of C57BL/6J.  
1013 The hypothalamus of C57BL/6J were dissected and immediately frozen in liquid nitrogen.  
1014 Total RNA from the hypothalamus was extracted with RNeasy kit (QIAGEN). 5'-RACE  
1015 was performed by SMARTer RACE 5'/3' kit (Clontech) by manufacture protocol. Briefly,  
1016 first-strand cDNA was synthesized with 5' RACE CDE Primer A (Clontech) (5'-RACE-  
1017 Ready cDNA samples), and the 5'-RACE-Ready cDNA sample was used for 5'-RACE  
1018 reaction with a htPrdm13 specific primer (5'-GATTACGCCAAGCTT-  
1019 TAGCGAAAGGTCCTCCAGCAGTA-3'). RACE products were purified by NuclearSpin  
1020 Gel (QIAGEN) and PCR Clean-Up Kit (QIAGEN). Purified RACE products were inserted  
1021 into pRACE vector with In-Fusion DM Master Mix. 5'-sequencing was confirmed by  
1022 reading more than seven independent clones in 5'-RACE products using primer (5'-  
1023 AAGCTTGGCGTAATC-3'). PCR was conducted using 5'-end primer (5'-  
1024 ATGGTGAGAGGGGAGCTGGT-3') and 3'-end primer (5'-

1025 TTAGGAGTCGTGCTCGCCAC-3') to confirm amplification of htPrdm13 using  
1026 hypothalamic cDNAs.

1027

### 1028 **Western blot analysis of Prdm13 from mouse hypothalamus**

1029 For antibody confirmation, the compact region of DMH from four DMH-*Prdm13*-KO or  
1030 control mice was collected by laser microdissection into Laemmli's sample buffer using  
1031 the Leica LMD 6000 system (Leica) and boiled 5 min. The detailed procedure for sample  
1032 preparation was described previously<sup>44</sup>. For fractionation, two C57BL/6J mouse  
1033 hypothalami were dissected into Buffer A [10 mM HEPES-KOH, pH 7.9, 10 mM KCl, 1.5  
1034 mM MgCl<sub>2</sub>, 0.5 mM DTT, 1 mM PMSF, protease inhibitor cocktail (Roche), 1 mM NaF,  
1035 1 mM Na<sub>3</sub>VO<sub>4</sub>]. The tissue was incubated on ice to swell 20 min. Samples were  
1036 homogenized 10 sec on medium speed using a Polytron homogenizer and centrifuged 3  
1037 min at 4,000 rpm. The resulting cytoplasmic supernatant (S1) was removed. The remaining  
1038 pellet was washed with Buffer A and centrifuged again. The washed pellet was  
1039 resuspended in Buffer B (20 mM HEPES-KOH, pH 7.9, 400 mM NaCl, 1.5 mM MgCl<sub>2</sub>,  
1040 200 mM EDTA, 0.5 mM DTT, 1 mM PMSF, protease inhibitor cocktail, 1 mM NaF, 1 mM  
1041 Na<sub>3</sub>VO<sub>4</sub>) with 200 µg/mL RNaseA and the sample was rocked 30 min at room temp and  
1042 centrifuged 3 min at 14,000 rpm. The resulting RNase-extractable supernatant (S2) was  
1043 removed. The remaining pellet was washed with Buffer B and centrifuged again. The  
1044 washed pellet was resuspended in Buffer B with 300 µg/ml DNase I (QIAGEN) and 5 mM  
1045 MgCl<sub>2</sub>. The sample was incubated 30 min at 37°C, mixing periodically, then centrifuged 3  
1046 min at 14,000 rpm. The resulting DNase-extractable supernatant (S3) was removed. The  
1047 remaining pellet was washed with Buffer B and centrifuged again. 2x Laemmli's sample  
1048 buffer was added to the insoluble pellet (P), homogenized with syringe and 28G needle,  
1049 and boiled 5 min. After centrifugation, no pellet remained. To make protein extracts from  
1050 S1-S3 fractions, 5x Laemmli's sample buffer was added and samples were boiled 5 min.  
1051 The 8% equivalent of each fraction by volume was run on a 4-15% TGX gel (Bio-Rad) for  
1052 Western blotting using affinity-purified polyclonal rabbit anti-mouse Prdm13. Antibodies  
1053 for Western blotting included affinity-purified polyclonal rabbit anti-mouse htPrdm13  
1054 (Covance), anti-Gapdh antibody (MAB374MI, Thermo Fisher Scientific) and anti-Histone  
1055 H3 antibody (#9715, Cell Signaling Technology).

1056

### 1057 **Western blot analysis of Prdm13 using Prdm13-PA-Tag hypothalami**

1058 Hypothalami from *Prdm13*-PA-Tag KI C57BL/6J mice or wild-type C57BL6J mice were  
1059 dissected and frozen in liquid nitrogen. One mouse brain was homogenized using a syringe  
1060 and needle in 60 µL of lysis buffer A (10 mM HEPES, pH 7.5, 2 mM MgCl<sub>2</sub>, 3 mM CaCl<sub>2</sub>,  
1061 300 mM sucrose, 1 mM DTT) supplemented with Halt Protease and Phosphatase Inhibitor  
1062 Cocktail (Thermo Fisher Scientific). The homogenates were incubated 10 min on ice and  
1063 centrifuged at 600xg for 5 min. The supernatants were transferred to new tubes as  
1064 cytoplasmic fractions. The pellets were resuspended in 60 µL of lysis buffer B (50 mM  
1065 HEPES, pH 7.4, 150 mM NaCl, 2.5% SDS, 2 mM MgCl<sub>2</sub>, 1 mM DTT) supplemented with  
1066 Halt Protease and Phosphatase Inhibitor Cocktail and homogenized using a syringe and  
1067 needle. The homogenates were centrifuged at 16,000xg for 20 min. The supernatants were  
1068 transferred to new tubes as nuclear fractions. Protein concentration was determined using  
1069 the BCA protein assay kit (Takara Bio).

1070

1071 Equal amounts of protein extracts were resolved by SDS-PAGE using 4-15% Mini-  
1072 PROTEAN TGX precast gel (Bio-Rad) and transferred to PVDF membrane. Prdm13-PA  
1073 was detected using anti-PA-Tag antibody conjugated with horse radish peroxidase (HRP)  
1074 (015-25951, Fujifirm). Histone H3 and Gapdh were detected using anti-histone H3  
1075 antibody (#9715, Cell Signaling Technology) or anti-Gapdh antibody (MA5-15738,  
1076 Thermo Fisher Scientific) as primary antibodies, and anti-rabbit IgG HRP linked whole  
1077 antibody (NA934V, GE Healthcare) or anti-mouse IgG HRP linked whole antibody  
1078 (NA931V, GE Healthcare) as secondary antibodies. Protein bands were visualized using  
1079 Amersham ECL select (Cytiva).

1080

### 1081 **Plasmid construction for reporter assay**

1082 Hypothalamic *Prdm13*-coding sequence was amplified from a cDNA of C57BL/6J mouse  
1083 hypothalamus using primers containing a FLAG-tag-coding sequence. The amplified DNA  
1084 fragment was introduced into pcDNA3.1(+) mammalian expression vector (Thermo Fisher  
1085 Scientific) using *EcoRI* and *XbaI* sites, creating pcDNA3.1-Prdm13 plasmid, which  
1086 expresses C-terminal FLAG-tagged hypothalamic *Prdm13* driven by the CMV promoter.  
1087 A plasmid expressing FLAG-tagged Prdm13-202 or mutants of Prdm13-202 was  
1088 constructed as follows. The coding sequence of amino acids (AA) 99-754 of Prdm13-202  
1089 and C-terminal FLAG tag was PCR amplified from the pcDNA3.1-Prdm13 plasmid. The  
1090 amplified DNA fragment and a DNA fragment coding AA 1-98 of Prdm13-202  
1091 synthesized as a gBlocks Gene Fragment (Integrated DNA Technologies), were assembled  
1092 into FCIV.FM1 vector using NEBuilder HiFi DNA Assembly Master Mix (New England  
1093 Biolabs), creating a plasmid expressing C-terminal FLAG-tagged Prdm13-202 driven by a  
1094 ubiquitin promoter. Similarly, the coding sequence of AA 181-754 of Prdm13-202 was  
1095 amplified and introduced into FCIV.FM1, creating a plasmid expressing the PR domain-  
1096 deletion mutant of Prdm13-202, named Prdm13 deltaPR. Prdm13-202 with amino acid  
1097 mutations (C187A, H207A, C622A, H638A, C650A, H666A, C679A, H695A) leading to  
1098 inactivation of four zinc finger domains<sup>28</sup> named Prdm13 mutZif. A plasmid expressing  
1099 Prdm13 mutZif was created by introducing DNA fragment coding Prdm13 mutZif  
1100 synthesized as a gBlocks Gene Fragment (Integrated DNA Technologies) into FCIV.FM1  
1101 vector. Luciferase reporter vectors were constructed as follows. Approximately 4 kbp  
1102 upstream sequence from the transcription start site of mouse *Cck*, *Grp* or *Pmch* gene was  
1103 PCR amplified and inserted into pGL4.1 (Promega) using *KpnI* and *HindIII* sites.

1104

### 1105 **Gene expression analysis of DMH samples**

1106 The compact region of the DMH was collected by laser microdissection using the Leica  
1107 LMD 6000 system (Leica). The detailed procedure for sample preparation was described  
1108 previously<sup>44</sup>. Total RNA was extracted following laser microdissection using the PicoPure  
1109 RNA isolation kit (Applied Biosystems). cDNA was synthesized using the Applied  
1110 Biosystems High Capacity cDNA Reverse Transcription Kit. Quantitative real-time RT-  
1111 PCR was conducted, and relative expression levels were calculated for each gene by  
1112 normalizing to *Gapdh* levels and then to the average of the control samples. Primers used  
1113 in this study were Mm99999915\_g1 (*Gapdh*), Mm00446170\_m1 (*Cck*), Mm00612977\_m1  
1114 (*Grp*), Mm01242886\_g1 (*Pmch*) and Mm01217509\_m1 (*Prdm13*) (Applied Biosystems).

1115

### 1116 **Reporter assay for *Prdm13* transcriptional variants and mutants**

1117 250 ng of the reporter plasmid and 250 ng of the expression plasmid were transiently co-  
1118 transfected into NIH3T3 cells<sup>45</sup> (a gift from Dr. Sugimoto) using HilyMax transfection  
1119 reagent (Dojindo). For mock assay, 250 ng of empty FCIV.FM1 vector was used instead  
1120 of the expression vector. After 24 hours, luminescence was measured using the dual  
1121 luciferase reporter system (Promega) without detecting renilla luciferase activity. Obtained  
1122 luminescence was normalized to total protein concentration measured by BCA protein  
1123 assay kit (Takara Bio).

1124

### 1125 **Wheel-running analysis**

1126 Mice were individually housed into cage with the Wireless Running Wheel (Med  
1127 Associates Inc.), and habituated for two weeks. Basal physical activity was recorded with  
1128 Wheel Manager Software (Med Associates Inc.) for 4-5 days under 12/12-hour light/dark  
1129 cycle. After the basal measurement, physical activity recorded under constant darkness for  
1130 10 days. Physical activity and period length were determined by Wheel Analysis Software  
1131 (Med Associates Inc.). Light/dark-cycles were strictly monitored by a light censor (Brain  
1132 Science Idea Co. Ltd.).

1133

### 1134 **Measurement of adipocyte size**

1135 Mice were anesthetized with isoflurane and perfused with PBS followed by 4% PFA. The  
1136 perigonadal WAT were fixed with 4% PFA overnight and placed into 70% ethanol.  
1137 Paraffin sections were prepared by Tissue Tech VIRTM 5 Junior (VIP-5-Jr-10, Sakura Fine  
1138 Chemical), and HE-staining was conducted by Multiple Slide Stainer (DRS 2000-B,  
1139 Sakura Fine Chemical). Slide images were scanned by Nanozoomer (Hamamatsu  
1140 Photonics). The sections were viewed at 20x magnification and randomly selected five  
1141 areas each section using Nanozoomer NDP.view2 (Hamamatsu Photonics). The size of  
1142 adipocytes was measured by ImageJ with Adipocyte\_Tools.ijm. Genotypes and conditions  
1143 were blinded during the experimental procedures.

1144

### 1145 **Longevity study**

1146 All animals were kept in our animal facility with free access to standard laboratory diet and  
1147 water. No mice used for the longevity study were used for any other biochemical,  
1148 physiological, or metabolic tests. The endpoint of life was the time when each mouse was  
1149 found dead during daily inspection. Moribund mice were euthanized according to our  
1150 institutional animal care guidelines, and the time at euthanasia was its endpoint. Survival  
1151 data of each cohort were analyzed by plotting the Kaplan-Meier curve and performing the  
1152 log-rank test using Prism. Tumor and organ tissues were dissected immediately after the  
1153 animals were euthanized or death, fixed with 10% formalin neutral buffer solution  
1154 (Fujifilm) for 24 hours, and processed for paraffin-embedded sections, followed by  
1155 hematoxylin-eosin staining for pathological diagnosis. Immunostainings were performed,  
1156 if necessary, for differentiation of tumors, by BOND MAX/III (Leica) with BOND  
1157 Polymer Refine Detection (ds9800; Leica). Antibodies against CD68 (1:2,000 dilution;  
1158 histiocytic marker; E3O7V; #97778; Cell Signaling Technology), alfa-fetoprotein (1:500  
1159 dilution; 14550-1-AP; Proteintech), CD45R (1:300 dilution; B-cell marker; B220;  
1160 #550286; BD Biosciences; with F[ab']<sub>2</sub> anti-rat IgG[H&L]; 1:500 dilution; 712-4126;  
1161 Rockland antibodies& assays) and CD3 (1:500 dilution; T-cell marker; 21120-1-AP;  
1162 Proteintech) were used.

1163

1164 **Statistical Analysis**

1165 Excel or Graph Pad Prizm 9 software was used for data quantification and generation of  
1166 graph. One-way ANOVA followed by Bonferroni's post hoc test was employed for  
1167 comparisons between three or more groups. Repeated measures ANOVA followed by  
1168 Bonferroni's post hoc test was employed for number of bouts or episode duration every 3  
1169 hours for a 24-hour period, EEG SWA for a 24-hour period and after SD, number of sleep  
1170 attempts during SD, amount of wakefulness, NREM sleep and REM sleep for a 24-hour  
1171 period and physical activity. Two-way ANOVA followed by Bonferroni's post hoc test was  
1172 employed for testing the differences between the age groups and experimental conditions.  
1173 FFT significance was determined by two-way ANOVA. Number of bouts and episode  
1174 duration significance at each period (light or dark period), total amount of wakefulness,  
1175 NREM or REM sleep each period (light, dark, or total 24-hour period) were determined by  
1176 unpaired Student's *t*-test. Pierson's correlation was employed for examining the relationship  
1177 between number of bouts and number of sleep attempts, or between total number of sleep  
1178 attempts and remaining lifespan. Log-rank test was employed for longevity study.
